# Supplementary material for: Two new species of Tardigrada from moss cushions (Grimmia sp.) in a xerothermic habitat in northeast Tennessee (USA, North America), with the first identification of males in the genus Viridiscus
Source: PeerJ. 2020 Nov 23;8:e10251. doi: 10.7717/peerj.10251 (PMC7690296; doi:10.7717/peerj.10251)
Supplement: Supplemental Information 1 [file peerj-08-10251-s001.xls]

## Sheet: COI
1. Macrobiotus basiatus sp. nov. (MT502116)		0.0149563	0.0148977	0.0158269	0.0157635	0.0159395	0.0162104	0.0160936	0.0162104	0.0174459	0.0152434	0.0153892	0.0151347	0.0153238	0.0154144	0.0172935	0.0177441	0.0177483	0.0149434	0.0152846	0.0167135	0.0167986	0.0169001	0.0169632	0.0181161	0.0181782	0.0148548	0.0170399	0.0167948	0.0171673
Macrobiotus canaricus Stec, Krzywański & Michalczyk, 2018 (GB: MH057765.1) (1)	0.162162		0.00485037	0.0162724	0.0168632	0.0168838	0.0165586	0.0164913	0.0164002	0.0187745	0.0163073	0.0163521	0.0164031	0.0161709	0.0161841	0.0185401	0.0163541	0.0161358	0.0163835	0.0161964	0.0162743	0.0161149	0.016152	0.0172888	0.0173865	0.0172851	0.0166671	0.0170316	0.0168313	0.0173429
Macrobiotus canaricus Stec, Krzywański & Michalczyk, 2018 (GB: MH057766.1) (1)	0.162162	0.0135135		0.0161545	0.0165827	0.0165956	0.0166122	0.0165112	0.0164366	0.0186963	0.0165198	0.0165392	0.016605	0.0163792	0.0163503	0.0184407	0.0162419	0.0161672	0.0165003	0.0162512	0.0161193	0.0159584	0.0159776	0.0173362	0.0174089	0.0173351	0.0165854	0.0169208	0.0164716	0.0173093
Macrobiotus hannae Nowak & Stec, 2018 (GB: MH057764.1) (2)	0.183398	0.179537	0.179537		0.0161105	0.0161603	0.0164514	0.0163052	0.0163052	0.0178524	0.0166418	0.016649	0.016713	0.0167606	0.0164883	0.01793	0.0186295	0.0190389	0.0164663	0.0166086	0.0161075	0.0161799	0.0161767	0.0179238	0.0184814	0.0185036	0.0162134	0.0171769	0.017729	0.017306
Macrobiotus cf. hufelandi (HQ876589.1) (3)	0.183398	0.194981	0.189189	0.177606		0.0026227	0.0109315	0.0106051	0.0106051	0.0175602	0.0158233	0.0159343	0.0158469	0.015781	0.0159074	0.017428	0.0173222	0.0175701	0.0162782	0.0162924	0.0170989	0.0171652	0.017153	0.0172829	0.017982	0.018056	0.0161483	0.016386	0.0178904	0.0171671
Macrobiotus cf. hufelandi (GB: HQ876590.1- HQ876596.1) (3)	0.185328	0.196911	0.19112	0.179537	0.003861		0.0110683	0.0107732	0.0107732	0.0174948	0.015668	0.0157654	0.0157199	0.0156004	0.0157699	0.0172719	0.0174072	0.0176428	0.0161988	0.0161554	0.0169284	0.0169927	0.0169958	0.0172896	0.0178651	0.0179429	0.0165121	0.0165581	0.0177744	0.0168981
Macrobiotus hufelandi C.A.S. Schultze, 1834 (GB: HQ876584.1) (3)	0.19112	0.183398	0.187259	0.183398	0.0694981	0.0694981		0.00264398	0.00186757	0.0168862	0.0154945	0.0155613	0.0156751	0.0159043	0.0159716	0.0171428	0.0172225	0.0170182	0.015171	0.0152982	0.0170436	0.016855	0.0167197	0.0166738	0.0175152	0.0176399	0.0167088	0.01695	0.0173401	0.0173392
Macrobiotus hufelandi C.A.S. Schultze, 1834 (GB: HQ876586.1) (3)	0.189189	0.183398	0.187259	0.181467	0.0675676	0.0675676	0.003861		0.00191106	0.0165795	0.0155303	0.0156033	0.0156963	0.0158928	0.0159592	0.0170729	0.0171144	0.0170212	0.0151311	0.0152694	0.0170449	0.0168652	0.0167639	0.0165761	0.0174147	0.0175362	0.0166061	0.0168468	0.0171848	0.0171356
Macrobiotus hufelandi C.A.S. Schultze, 1834 (GB: HQ876587.1- HQ876588.1) (3)	0.19112	0.181467	0.185328	0.181467	0.0675676	0.0675676	0.0019305	0.0019305		0.0166799	0.0154945	0.0155613	0.0156751	0.0159043	0.0159716	0.0169854	0.0171144	0.0169405	0.0151264	0.0153102	0.0169299	0.0167459	0.0166245	0.0165761	0.0173999	0.0175309	0.0165279	0.0168468	0.0171911	0.0171806
Macrobiotus kristenseni Guidetti, Peluffo, Rocha, Cesari & Moly de Peluffo, 2013 (GB: KC193575.1- KC193576.1) (4)	0.227799	0.247104	0.245174	0.247104	0.216216	0.216216	0.204633	0.200772	0.202703		0.0180752	0.0181276	0.0180909	0.0179423	0.0182147	0.0166153	0.0176956	0.0177968	0.0167418	0.0169259	0.0171682	0.0174662	0.0175145	0.0170061	0.017163	0.0172229	0.0172567	0.0179336	0.0181375	0.01633
Macrobiotus macrocalix Bertolani & Rebecchi, 1993 (GB: FJ176203.1- FJ176205.1, FJ176207.1) (5)	0.166023	0.19112	0.19305	0.200772	0.177606	0.177606	0.166023	0.167954	0.166023	0.212355		0.00192469	0.00321505	0.00358934	0.00357996	0.017733	0.0179812	0.0177286	0.0156305	0.0158514	0.014889	0.0148578	0.0147757	0.0182342	0.0162402	0.0161179	0.0158127	0.0172386	0.0166764	0.0178027
Macrobiotus macrocalix Bertolani & Rebecchi, 1993 (GB: FJ176206.1) (5)	0.167954	0.19305	0.194981	0.202703	0.179537	0.179537	0.167954	0.169884	0.167954	0.214286	0.0019305		0.00374115	0.00404705	0.00413379	0.0179019	0.0179812	0.0177286	0.0156806	0.0158702	0.0147913	0.014765	0.0146651	0.0183262	0.0164004	0.0162665	0.0157208	0.0173663	0.0168497	0.0177569
Macrobiotus macrocalix Bertolani & Rebecchi, 1993 (GB: FJ176208.1- FJ176209.1) (5)	0.167954	0.19112	0.19305	0.202703	0.179537	0.179537	0.171815	0.173745	0.171815	0.210425	0.00579151	0.00772201		0.00421873	0.00419654	0.0179102	0.0181441	0.0178411	0.0159928	0.016212	0.015072	0.0150417	0.0149371	0.0184156	0.0163201	0.0161698	0.0161126	0.0169999	0.0164935	0.017629
Macrobiotus macrocalix Bertolani & Rebecchi, 1993 (GB: FJ176213.1- FJ176217.1) (5)	0.166023	0.189189	0.19112	0.198842	0.177606	0.177606	0.169884	0.171815	0.169884	0.210425	0.00772201	0.00965251	0.00965251		0.00349017	0.017512	0.018113	0.0179569	0.0155594	0.0158479	0.014847	0.0148339	0.0149358	0.0180839	0.0161815	0.0160411	0.0156768	0.0171998	0.0167748	0.0176576
Macrobiotus macrocalix Bertolani & Rebecchi, 1993 (GB: MH057767.1) (1)	0.169884	0.189189	0.19112	0.196911	0.179537	0.179537	0.173745	0.175676	0.173745	0.214286	0.00772201	0.00965251	0.00965251	0.00772201		0.0179155	0.0180119	0.017829	0.0159559	0.016223	0.0151234	0.0151155	0.0150134	0.0184257	0.0163201	0.0162168	0.0156386	0.0171504	0.0165315	0.0174803
Macrobiotus papei Stec, Kristensen & Michalczyk, 2018 (MH057763.1) (6)	0.225869	0.249035	0.250965	0.243243	0.243243	0.239382	0.233591	0.22973	0.23166	0.206564	0.235521	0.237452	0.233591	0.22973	0.235521		0.0172412	0.0173541	0.0168135	0.0167267	0.0167029	0.0168684	0.0169739	0.0169264	0.0162722	0.0164186	0.0173842	0.0186068	0.0169689	0.0162022
Macrobiotus polypiformis Roszkowska, Ostrowska, Stec, Janko & Kaczmarek, 2017 (GB: KX810011.1) (7)	0.23166	0.212355	0.210425	0.249035	0.239382	0.239382	0.22973	0.227799	0.227799	0.237452	0.258687	0.258687	0.260618	0.258687	0.258687	0.239382		0.00783482	0.0179708	0.0178134	0.0180158	0.0177759	0.0177515	0.0172282	0.0161175	0.0163573	0.0174011	0.0175936	0.0171155	0.0165098
Macrobiotus polypiformis Roszkowska, Ostrowska, Stec, Janko & Kaczmarek, 2017 (GB: KX810012.1) (7)	0.233591	0.220077	0.218147	0.260618	0.239382	0.239382	0.222008	0.222008	0.220077	0.241313	0.258687	0.258687	0.260618	0.258687	0.258687	0.243243	0.0328185		0.0180479	0.0180098	0.0178952	0.0176828	0.0176557	0.0174635	0.0163166	0.0165315	0.0178369	0.017754	0.0176762	0.0165306
Macrobiotus cf. recens (GB: MH057769.1) (1)	0.164093	0.19112	0.187259	0.177606	0.189189	0.189189	0.177606	0.173745	0.175676	0.225869	0.171815	0.173745	0.177606	0.171815	0.175676	0.227799	0.227799	0.22973		0.00474923	0.0160322	0.0159589	0.0160773	0.016957	0.0166173	0.0168467	0.0167836	0.0156651	0.0165424	0.0171713
Macrobiotus cf. recens (GB: MH057768.1) (1)	0.171815	0.19305	0.189189	0.181467	0.19305	0.189189	0.179537	0.175676	0.177606	0.227799	0.175676	0.177606	0.181467	0.175676	0.179537	0.22973	0.222008	0.227799	0.0135135		0.0158516	0.0157367	0.0158991	0.0169343	0.0163858	0.0166602	0.0165887	0.0154546	0.016408	0.0171137
Macrobiotus sandrae Bertolani & Rebecchi, 1993 (GB: HQ876569.1- HQ876573.1, HQ876566.1- HQ876567.1) (3)	0.19112	0.198842	0.196911	0.185328	0.187259	0.183398	0.183398	0.183398	0.181467	0.220077	0.175676	0.173745	0.177606	0.171815	0.175676	0.223938	0.23166	0.23166	0.200772	0.196911		0.00380449	0.00444879	0.017136	0.0164713	0.016316	0.0152086	0.0166138	0.0164077	0.0158262
Macrobiotus sandrae Bertolani & Rebecchi, 1993 (GB: HQ876574.1, HQ876577.1- HQ876579.1, HQ876581.1) (3)	0.19112	0.196911	0.194981	0.181467	0.187259	0.183398	0.179537	0.179537	0.177606	0.220077	0.175676	0.173745	0.177606	0.171815	0.175676	0.220077	0.23166	0.23166	0.198842	0.194981	0.00772201		0.00186958	0.0171748	0.0166779	0.0165412	0.0151281	0.0163384	0.0163002	0.0158554
Macrobiotus sandrae Bertolani & Rebecchi, 1993 (GB: HQ876575.1- HQ876576.1, HQ876580.1, HQ876582.1- HQ876583.1) (3)	0.19305	0.198842	0.196911	0.183398	0.189189	0.185328	0.181467	0.181467	0.179537	0.222008	0.173745	0.171815	0.175676	0.173745	0.173745	0.222008	0.233591	0.233591	0.200772	0.196911	0.00965251	0.0019305		0.01719	0.0167088	0.0165683	0.0153087	0.0162191	0.0163811	0.0159048
Macrobiotus scoticus Stec, Morek, Gąsiorek, Blagden & Michalczyk, 2017 (GB: KY797267.1) (8)	0.220077	0.237452	0.241313	0.227799	0.235521	0.237452	0.216216	0.214286	0.214286	0.202703	0.208494	0.210425	0.210425	0.206564	0.214286	0.189189	0.233591	0.23166	0.214286	0.218147	0.23166	0.223938	0.225869		0.0174138	0.0175049	0.0172995	0.0181636	0.0179887	0.016954
Macrobiotus shonaicus Stec, Arakawa & Michalczyk, 2018 (MG757136.1) (9)	0.220077	0.223938	0.222008	0.239382	0.250965	0.250965	0.239382	0.239382	0.237452	0.218147	0.212355	0.214286	0.218147	0.214286	0.214286	0.206564	0.202703	0.202703	0.227799	0.227799	0.225869	0.223938	0.222008	0.206564		0.00381037	0.0175973	0.0173989	0.0178224	0.016671
Macrobiotus shonaicus Stec, Arakawa & Michalczyk, 2018 (GB: MG757137.1) (9)	0.223938	0.222008	0.220077	0.239382	0.252896	0.252896	0.241313	0.241313	0.239382	0.222008	0.216216	0.218147	0.222008	0.218147	0.218147	0.208494	0.208494	0.208494	0.227799	0.227799	0.225869	0.223938	0.222008	0.210425	0.00772201		0.0175858	0.0172385	0.0177321	0.016607
Macrobiotus terminalis Bertolani & Rebecchi, 1993 (GB: AY598775.1) (10)	0.15251	0.187259	0.185328	0.179537	0.19305	0.196911	0.200772	0.200772	0.198842	0.214286	0.164093	0.162162	0.166023	0.162162	0.160232	0.225869	0.23166	0.233591	0.189189	0.189189	0.169884	0.166023	0.167954	0.204633	0.237452	0.237452		0.0169592	0.0158688	0.0166164
Macrobiotus terminalis Bertolani & Rebecchi, 1993 (GB: JN673960.1) (11)	0.196911	0.208494	0.204633	0.202703	0.196911	0.200772	0.210425	0.208494	0.208494	0.235521	0.196911	0.198842	0.194981	0.194981	0.194981	0.243243	0.233591	0.241313	0.181467	0.185328	0.194981	0.196911	0.194981	0.220077	0.222008	0.225869	0.200772		0.0172462	0.018141
Macrobiotus vladimiri Bertolani, Biserov, Rebecchi & Cesari, 2011 (GB: HM136931.1- HM136934.1, HQ876568.1) (3)	0.194981	0.204633	0.198842	0.22973	0.223938	0.222008	0.218147	0.218147	0.216216	0.262548	0.19305	0.194981	0.194981	0.196911	0.19305	0.223938	0.235521	0.243243	0.202703	0.202703	0.185328	0.185328	0.187259	0.245174	0.243243	0.247104	0.177606	0.210425		0.0168091
Macrobiotus paulinae Stec, Smolak, Kaczmarek & Michalczyk, 2015 (GB: KT951668) (12)	0.222008	0.212355	0.210425	0.225869	0.247104	0.243243	0.227799	0.227799	0.225869	0.206564	0.220077	0.218147	0.218147	0.218147	0.216216	0.196911	0.200772	0.204633	0.214286	0.212355	0.200772	0.200772	0.202703	0.200772	0.218147	0.220077	0.194981	0.241313	0.235521
1) Stec, D., Krzywański, Ł. & Michalczyk, Ł. (2018) Integrative description of Macrobiotus canaricus sp. nov. with notes on M. recens (Eutardigrada: Macrobiotidae). European Journal of Taxonomy, 452: 1-36.
2) Nowak, B. & Stec, D. (2018) An integrative description of Macrobiotus hannae sp. nov. (Tardigrada: Eutardigrada: Macrobiotidae: hufelandi group) from Poland. Turkish Journal of Zoology, 42: 269-286.
3) Bertolani, R., Rebecchi, L., Giovannini, I. & Cesari, M. (2011) DNA barcoding and integrative taxonomy of Macrobiotus hufelandi C.A.S. Schultze 1834, the first tardigrade species to be described, and some related species. Zootaxa, 2997: 19-36.
4) Guidetti, R., Peluffo, J.R., Rocha, A.M., Cesari, M. & Moly de Peluffo, M.C. (2013) The morphological and molecular analyses of a new South American urban tardigrade offer new insights on the biological meaning of the Macrobiotus hufelandi group of species (Tardigrada: Macrobiotidae). Journal of Natural History, 47(37-38): 2409-2426.
5) Cesari, M., Bertolani, R., Rebecchi, L. & Guidetti, R. (2009) DNA barcoding in Tardigrada: the first case study on Macrobiotus macrocalix Bertolani & Rebecchi 1993 (Eutardigrada, Macrobiotidae). Molecular Ecology Resources, 9(3): 699-706.
6) Stec, D., Kristensen, R.M. & Michalczyk, Ł. (2018) Integrative taxonomy identifies Macrobiotus papei, a new tardigrade species of the Macrobiotus hufelandi complex (Eutardigrada: Macrobiotidae) from the Udzungwa Mountains National Park (Tanzania). Zootaxa, 4446(2): 273-291.
7) Roszkowska, M., Ostrowska, M., Stec, D., Janko, K. & Kaczmarek, Ł. (2017) Macrobiotus polypiformis sp. nov., a new tardigrade (Macrobiotidae; hufelandi group) from the Ecuadorian Pacific coast, with remarks on the claw abnormalities in eutardigrades. European Journal of Taxonomy, 327: 1-19.
8) Stec, D., Morek, W., Gąsiorek, P., Blagden, B. & Michalczyk, Ł. (2017) Description of Macrobiotus scoticus sp. nov. (Tardigrada: Macrobiotidae: hufelandi group) from Scotland by means of integrative taxonomy. Annales Zoologici, 67(2): 181-197.
9) Stec, D., Arakawa, K. & Michalczyk, Ł. (2018) An integrative description of Macrobiotus shonaicus sp. nov. (Tardigrada: Macrobiotidae) from Japan with notes on its phylogenetic position within the hufelandi group. PLoS ONE, 13(2): e0192210.
10) Guidetti, R., Gandolfi, A., Rossi, V. & Bertolani, R. (2005) Phylogenetic analysis of Macrobiotidae (Eutardigrada, Parachela): a combined morphological and molecular approach. Zoologica Scripta, 34: 235-244.
11) Cesari, M., Giovanni, I., Bertolani, R. & Rebecchi, L. (2011) An example of problems associated with DNA barcoding in tardigrades: a novel method for obtaining voucher specimens. Zootaxa: 3104: 42-51.
12) Stec, D., Smolak, R., Kaczmarek, Ł. & Michalczyk, Ł. (2015) An integrative description of Macrobiotus paulinae sp. nov. (Tardigrada: Eutardigrada: Macrobiotidae: hufelandi group) from Kenya. Zootaxa, 4052(5): 501-526.
Table. Estimates of Evolutionary Divergence between Sequences
The number of base differences per site from between sequences are shown. Standard error estimate(s) are shown above the diagonal. The analysis involved 30 nucleotide sequences. Codon positions included were 1st+2nd+3rd+Noncoding. All positions containing gaps and missing data were eliminated. There were a total of 518 positions in the final dataset. Evolutionary analyses were conducted in MEGA7 …
1. Kumar S., Stecher G., and Tamura K. (2016). MEGA7: Molecular Evolutionary Genetics Analysis version 7.0 for bigger datasets.Molecular Biology and Evolution 33:1870-1874.

## Sheet: ITS2
Macrobiotus canaricus Stec, Krzywański & Michalczyk, 2018 (GB: MH063928) (1)		0.00506036	0.00888828	0.0279306	0.0188981	0.0313172	0.0289622	0.027841	0.0326037	0.0312115	0.0324726	0.0298362	0.0298362	0.0217077	0.0212263	0.0175402	0.0175402	0.0175402	0.0175402	0.0175402	0.0175402
Macrobiotus canaricus Stec, Krzywański & Michalczyk, 2018 (GB: MH063929) (1)	0.00518135		0.00705316	0.0279011	0.0192652	0.0313172	0.0289259	0.02793	0.0322435	0.0312115	0.0325204	0.0299008	0.0299008	0.0220799	0.021609	0.0179341	0.0179341	0.0179341	0.0179341	0.0179341	0.0179341
Macrobiotus canaricus Stec, Krzywański & Michalczyk, 2018 (GB: MH063930) (1)	0.015544	0.0103627		0.0287244	0.0203622	0.0318251	0.0294364	0.028405	0.0330142	0.0317499	0.0330849	0.030693	0.030693	0.0231523	0.0227998	0.0191663	0.0191663	0.0191663	0.0191663	0.0191663	0.0191663
Macrobiotus hannae Nowak & Stec, 2018 (GB: MH063923) (2)	0.186528	0.19171	0.202073		0.0259404	0.0297557	0.0308453	0.0282346	0.0303382	0.0291761	0.0327683	0.0292335	0.0292658	0.027096	0.0263667	0.0268889	0.0268889	0.0268889	0.0268889	0.0268889	0.0268889
Macrobiotus macrocalix Bertolani & Rebecchi, 1993 (GB: MH063931) (1)	0.0829016	0.0880829	0.0984456	0.165803		0.0306538	0.0305277	0.0248575	0.0317499	0.0300954	0.0317535	0.0298277	0.0298277	0.0165329	0.0149638	0.0200289	0.0200289	0.0200289	0.0200289	0.0200289	0.0200289
Macrobiotus papei Stec, Kristensen & Michalczyk, 2018 (GB: MH063921) (3)	0.233161	0.233161	0.238342	0.217617	0.233161		0.024746	0.0297794	0.0297219	0.0156559	0.0319219	0.0191502	0.0191502	0.0320983	0.0317975	0.0314475	0.0314475	0.0314475	0.0314475	0.0314475	0.0314475
Macrobiotus paulinae Stec, Smolak, Kaczmarek & Michalczyk, 2015 (GB: KT935500) (4)	0.233161	0.238342	0.248705	0.264249	0.248705	0.15544		0.0290955	0.0309891	0.0242448	0.0330951	0.0229991	0.0224565	0.0310198	0.0306933	0.0305128	0.0305128	0.0305128	0.0305128	0.0305128	0.0305128
Macrobiotus polonicus Pilato, Kaczmarek, Michalczyk & Lisi, 2003 (GB: HM150647) (5)	0.181347	0.186528	0.196891	0.19171	0.145078	0.212435	0.243523		0.0327792	0.0289049	0.0329506	0.0290622	0.0290622	0.0265525	0.026785	0.0278993	0.0278993	0.0278993	0.0278993	0.0278993	0.0278993
Macrobiotus polypiformis Roszkowska, Ostrowska, Stec, Janko & Kaczmarek, 2017 (GB: KX810010) (6)	0.300518	0.305699	0.316062	0.248705	0.305699	0.248705	0.264249	0.300518		0.0294905	0.0290882	0.0288909	0.0288909	0.033158	0.0327279	0.0328898	0.0328898	0.0328898	0.0328898	0.0328898	0.0328898
Macrobiotus sapiens Binda & Pilato, 1984 (GB: GQ403680) (7)	0.233161	0.233161	0.238342	0.202073	0.238342	0.0518135	0.145078	0.222798	0.253886		0.0313031	0.016684	0.0171532	0.0308682	0.0306969	0.0313358	0.0313358	0.0313358	0.0313358	0.0313358	0.0313358
Macrobiotus scoticus Stec, Morek, Gąsiorek, Blagden & Michalczyk, 2017 (GB: KY797268) (8)	0.305699	0.300518	0.305699	0.279793	0.264249	0.233161	0.274611	0.274611	0.243523	0.227979		0.030295	0.0304712	0.0330519	0.0328251	0.032703	0.032703	0.032703	0.032703	0.032703	0.032703
Macrobiotus shonaicus Stec, Arakawa & Michalczyk, 2018 (GB: MG757134) (9)	0.212435	0.217617	0.227979	0.207254	0.233161	0.0829016	0.119171	0.217617	0.222798	0.0673575	0.227979		0.0051184	0.0316334	0.031473	0.0305959	0.0305959	0.0305959	0.0305959	0.0305959	0.0305959
Macrobiotus shonaicus Stec, Arakawa & Michalczyk, 2018 (GB: MG757135) (9)	0.212435	0.217617	0.227979	0.212435	0.233161	0.0829016	0.11399	0.217617	0.222798	0.0725389	0.233161	0.00518135		0.0316334	0.031473	0.0305959	0.0305959	0.0305959	0.0305959	0.0305959	0.0305959
Macrobiotus cf. recens (GB: MH063932) (1)	0.108808	0.11399	0.124352	0.19171	0.0569948	0.264249	0.253886	0.160622	0.316062	0.253886	0.284974	0.259067	0.259067		0.0073373	0.0210359	0.0210359	0.0210359	0.0210359	0.0210359	0.0210359
Macrobiotus cf. recens (GB: MH063933) (1)	0.0984456	0.103627	0.11399	0.181347	0.0466321	0.259067	0.248705	0.160622	0.305699	0.248705	0.279793	0.253886	0.253886	0.0103627		0.0205397	0.0205397	0.0205397	0.0205397	0.0205397	0.0205397
1. Macrobiotus basiatus sp. nov. (MT505165)	0.0725389	0.0777202	0.0880829	0.181347	0.0984456	0.233161	0.264249	0.181347	0.305699	0.243523	0.316062	0.243523	0.243523	0.11399	0.103627		0	0	0	0	0
2. Macrobiotus basiatus sp. nov. (MT505166)	0.0725389	0.0777202	0.0880829	0.181347	0.0984456	0.233161	0.264249	0.181347	0.305699	0.243523	0.316062	0.243523	0.243523	0.11399	0.103627	0		0	0	0	0
3. Macrobiotus basiatus sp. nov. (MT505167)	0.0725389	0.0777202	0.0880829	0.181347	0.0984456	0.233161	0.264249	0.181347	0.305699	0.243523	0.316062	0.243523	0.243523	0.11399	0.103627	0	0		0	0	0
4. Macrobiotus basiatus sp. nov. (MT505168)	0.0725389	0.0777202	0.0880829	0.181347	0.0984456	0.233161	0.264249	0.181347	0.305699	0.243523	0.316062	0.243523	0.243523	0.11399	0.103627	0	0	0		0	0
5. Macrobiotus basiatus sp. nov. (MT505169)	0.0725389	0.0777202	0.0880829	0.181347	0.0984456	0.233161	0.264249	0.181347	0.305699	0.243523	0.316062	0.243523	0.243523	0.11399	0.103627	0	0	0	0		0
6. Macrobiotus basiatus sp. nov. (MT505170)	0.0725389	0.0777202	0.0880829	0.181347	0.0984456	0.233161	0.264249	0.181347	0.305699	0.243523	0.316062	0.243523	0.243523	0.11399	0.103627	0	0	0	0	0
1) Stec, D., Krzywański, Ł. & Michalczyk, Ł. (2018) Integrative description of Macrobiotus canaricus sp. nov. with notes on M. recens (Eutardigrada: Macrobiotidae). European Journal of Taxonomy, 452: 1-36.
2) Nowak, B. & Stec, D. (2018) An integrative description of Macrobiotus hannae sp. nov. (Tardigrada: Eutardigrada: Macrobiotidae: hufelandi group) from Poland. Turkish Journal of Zoology, 42: 269-286.
3) Stec, D., Kristensen, R.M. & Michalczyk, Ł. (2018) Integrative taxonomy identifies Macrobiotus papei, a new tardigrade species of the Macrobiotus hufelandi complex (Eutardigrada: Macrobiotidae) from the Udzungwa Mountains National Park (Tanzania). Zootaxa, 4446(2): 273-291.
4) Stec, D., Smolak, R., Kaczmarek, Ł. & Michalczyk, Ł. (2015) An integrative description of Macrobiotus paulinae sp. nov. (Tardigrada: Eutardigrada: Macrobiotidae: hufelandi group) from Kenya. Zootaxa, 4052(5): 501-526.
5) Welnicz, W., Grohme, M.A., Kaczmarek, Ł., Schill, R.O. & Frohme, M. (2011) ITS-2 and 18S rRNA data from Macrobiotus polonicus and Milnesium tardigradum (Eutardigrada, Tardigrada). Journal of Zoological Systematics and Evolutionary Research, 49(S1): 34-39.
6) Roszkowska, M., Ostrowska, M., Stec, D., Janko, K. & Kaczmarek, Ł. (2017) Macrobiotus polypiformis sp. nov., a new tardigrade (Macrobiotidae; hufelandi group) from the Ecuadorian Pacific coast, with remarks on the claw abnormalities in eutardigrades. European Journal of Taxonomy, 327: 1-19.
7) Schill, R.O., Forster, F., Dandekar, T. & Wolf, N. (2010) Using compensatory base change analysis of internal transcribed spacer 2 secondary structures to identify three new species in Paramacrobiotus (Tardigrada). Organisms Diversity & Evolution, 10(4): 287-296.
8) Stec, D., Morek, W., Gąsiorek, P., Blagden, B. & Michalczyk, Ł. (2017) Description of Macrobiotus scoticus sp. nov. (Tardigrada: Macrobiotidae: hufelandi group) from Scotland by means of integrative taxonomy. Annales Zoologici, 67(2): 181-197.
9) Stec, D., Arakawa, K. & Michalczyk, Ł. (2018) An integrative description of Macrobiotus shonaicus sp. nov. (Tardigrada: Macrobiotidae) from Japan with notes on its phylogenetic position within the hufelandi group. PLoS ONE, 13(2): e0192210.
Table. Estimates of Evolutionary Divergence between Sequences
The number of base differences per site from between sequences are shown. Standard error estimate(s) are shown above the diagonal. The analysis involved 21 nucleotide sequences. Codon positions included were 1st+2nd+3rd+Noncoding. All positions containing gaps and missing data were eliminated. There were a total of 193 positions in the final dataset. Evolutionary analyses were conducted in MEGA7 …
1. Kumar S., Stecher G., and Tamura K. (2016). MEGA7: Molecular Evolutionary Genetics Analysis version 7.0 for bigger datasets.Molecular Biology and Evolution 33:1870-1874.

## Sheet: 18S rRNA
Macrobiotus canaricus Stec, Krzywański & Michalczyk, 2018 (GB: MH063925) (1)		0.00455468	0.00455468	0.00455468	0.00216881	0.00216881	0.00244948	0.00515224	0.00586949	0.00563917	0.00258733	0.00258733	0.00515224	0.00574551	0.00589662	0.00652339	0.00288112	0.00530127	0.00570013	0.00546884	0.00336932
Macrobiotus hannae Nowak & Stec, 2018 (GB: MH063922) (2)	0.0186667		0	0	0.00429247	0.00429247	0.00448097	0.00568731	0.00700013	0.00633167	0.00471668	0.00471668	0.00568731	0.00648947	0.00668502	0.00706568	0.00487445	0.0058659	0.00621378	0.00588437	0.00507624
Macrobiotus hannae Nowak & Stec, 2018 (reported as Mac. joannae in GB) (GB: HQ604974) (2)	0.0186667	0		0	0.00429247	0.00429247	0.00448097	0.00568731	0.00700013	0.00633167	0.00471668	0.00471668	0.00568731	0.00648947	0.00668502	0.00706568	0.00487445	0.0058659	0.00621378	0.00588437	0.00507624
Macrobiotus hannae Nowak & Stec, 2018 (reported as Mac. joannae in GB) (GB: HQ604975) (2)	0.0186667	0	0		0.00429247	0.00429247	0.00448097	0.00568731	0.00700013	0.00633167	0.00471668	0.00471668	0.00568731	0.00648947	0.00668502	0.00706568	0.00487445	0.0058659	0.00621378	0.00588437	0.00507624
Macrobiotus hufelandi group (GB: FJ435738) (3)	0.004	0.016	0.016	0.016		0	0.00129949	0.00496942	0.00573838	0.00545349	0.00213504	0.00213504	0.00496942	0.00555489	0.00599638	0.00663479	0.00254073	0.0051297	0.00556753	0.00528393	0.00321987
Macrobiotus hufelandi group (GB: FJ435739) (3)	0.004	0.016	0.016	0.016	0		0.00129949	0.00496942	0.00573838	0.00545349	0.00213504	0.00213504	0.00496942	0.00555489	0.00599638	0.00663479	0.00254073	0.0051297	0.00556753	0.00528393	0.00321987
Macrobiotus hufelandi group (GB: FJ435740) (3)	0.00533333	0.0173333	0.0173333	0.0173333	0.00133333	0.00133333		0.00509756	0.00586247	0.00554031	0.00243745	0.00243745	0.00509756	0.00559842	0.00615925	0.00667228	0.00285499	0.00524856	0.0056515	0.00538474	0.00348323
Macrobiotus hufelandi group (GB: HQ604971) (4)	0.024	0.0293333	0.0293333	0.0293333	0.0226667	0.0226667	0.024		0.00653887	0.00258931	0.00532433	0.00532433	0	0.00353993	0.00639908	0.00582621	0.00524586	0.00198002	0.00310271	0.00182586	0.00545573
Macrobiotus hufelandi C.A.S. Schultze, 1834 (GB: GQ849024) (5)	0.0306667	0.0413333	0.0413333	0.0413333	0.0293333	0.0293333	0.0306667	0.0373333		0.00690896	0.00600729	0.00600729	0.00653887	0.00625788	0.00800551	0.00781282	0.00602907	0.00653887	0.00662115	0.00657519	0.00590578
Macrobiotus kristenseni Guidetti, Peluffo, Rocha, Cesari & Moly de Peluffo, 2013 (GB: KC193577) (6)	0.0266667	0.0346667	0.0346667	0.0346667	0.0253333	0.0253333	0.0266667	0.00533333	0.04		0.00567412	0.00567412	0.00258931	0.00438303	0.00696866	0.00638287	0.00561407	0.00331117	0.00389055	0.00329662	0.00596852
Macrobiotus macrocalix Bertolani & Rebecchi, 1993 (GB: HQ604976) (4)	0.00533333	0.0186667	0.0186667	0.0186667	0.004	0.004	0.00533333	0.0253333	0.0306667	0.028		0	0.00532433	0.00591815	0.00617862	0.00676093	0.0022744	0.00549008	0.00594234	0.00558585	0.00346687
Macrobiotus macrocalix Bertolani & Rebecchi, 1993 (GB: MH063926) (4)	0.00533333	0.0186667	0.0186667	0.0186667	0.004	0.004	0.00533333	0.0253333	0.0306667	0.028	0		0.00532433	0.00591815	0.00617862	0.00676093	0.0022744	0.00549008	0.00594234	0.00558585	0.00346687
Macrobiotus papei Stec, Kristensen & Michalczyk, 2018 (GB: MH063881) (7)	0.024	0.0293333	0.0293333	0.0293333	0.0226667	0.0226667	0.024	0	0.0373333	0.00533333	0.0253333	0.0253333		0.00353993	0.00639908	0.00582621	0.00524586	0.00198002	0.00310271	0.00182586	0.00545573
Macrobiotus paulinae Stec, Smolak, Kaczmarek & Michalczyk, 2015 (GB: KT935502) (8)	0.028	0.0373333	0.0373333	0.0373333	0.0266667	0.0266667	0.028	0.0106667	0.036	0.016	0.0293333	0.0293333	0.0106667		0.00674539	0.00615138	0.00574359	0.00383678	0.00342626	0.00361368	0.00598729
Macrobiotus polonicus Pilato, Kaczmarek, Michalczyk & Lisi, 2003 (GB: HM187580) (9)	0.032	0.0386667	0.0386667	0.0386667	0.032	0.032	0.0333333	0.0333333	0.0586667	0.0386667	0.0346667	0.0346667	0.0333333	0.0413333		0.00744868	0.00640274	0.00648598	0.00694002	0.00670989	0.00651227
Macrobiotus polypiformis Roszkowska, Ostrowska, Stec, Janko & Kaczmarek, 2017 (GB: KX810008) (10)	0.036	0.044	0.044	0.044	0.0373333	0.0373333	0.0386667	0.028	0.052	0.0333333	0.04	0.04	0.028	0.0306667	0.052		0.00659757	0.00619361	0.0057851	0.00580866	0.00669572
Macrobiotus cf. recens (GB: MH063927) (1)	0.00666667	0.02	0.02	0.02	0.00533333	0.00533333	0.00666667	0.024	0.032	0.0266667	0.004	0.004	0.024	0.028	0.036	0.0386667		0.00541519	0.00570694	0.00546977	0.00360858
Macrobiotus sapiens Binda & Pilato, 1984 (GB: DQ839601) (11)	0.0253333	0.0306667	0.0306667	0.0306667	0.024	0.024	0.0253333	0.00266667	0.0373333	0.008	0.0266667	0.0266667	0.00266667	0.012	0.0346667	0.0306667	0.0253333		0.00341225	0.0025818	0.00560874
Macrobiotus scoticus Stec, Morek, Gąsiorek, Blagden & Michalczyk, 2017 (GB: KY797265) (12)	0.0293333	0.0346667	0.0346667	0.0346667	0.028	0.028	0.0293333	0.008	0.04	0.0133333	0.0306667	0.0306667	0.008	0.0106667	0.0386667	0.0266667	0.0293333	0.00933333		0.0031886	0.005887
Macrobiotus shonaicus Stec, Arakawa & Michalczyk, 2018 (GB: MG757132) (13)	0.0266667	0.032	0.032	0.032	0.0253333	0.0253333	0.0266667	0.00266667	0.0373333	0.008	0.028	0.028	0.00266667	0.0106667	0.036	0.028	0.0266667	0.00533333	0.008		0.00579984
1. Macrobiotus basiatus sp. nov. (MT498094)	0.0106667	0.024	0.024	0.024	0.00933333	0.00933333	0.0106667	0.0253333	0.0293333	0.028	0.0106667	0.0106667	0.0253333	0.0293333	0.0373333	0.0386667	0.012	0.0266667	0.0306667	0.028
1) Stec, D., Krzywański, Ł. & Michalczyk, Ł. (2018) Integrative description of Macrobiotus canaricus sp. nov. with notes on M. recens (Eutardigrada: Macrobiotidae). European Journal of Taxonomy, 452: 1-36.
2) Nowak, B. & Stec, D. (2018) An integrative description of Macrobiotus hannae sp. nov. (Tardigrada: Eutardigrada: Macrobiotidae: hufelandi group) from Poland. Turkish Journal of Zoology, 42: 269-286.
3) Guil, N. & Giribet, G. (2012) A comprehensive molecular phylogeny of tardigrades - adding genes and taxa to a poorly resolved phylum-level phylogeny. Cladistics, 28(1): 21-49.
4) Bertolani, R., Guidetti, R., Marchioro, T., Altiero, T., Rebecchi, L. & Cesari, M. (2014) Phylogeny of Eutardigrada: New molecular data and their morphological support lead to the identification of new evolutionary lineages. Molecular Phylogenetics and Evolution, 76: 110-126.
5) Jorgensen, A., Faurby, S., Hansen, J.G., Mobjerg, N. & Kristensen, R.M. (2010) Molecular phylogeny of Arthrotardigrada (Tardigrada). Molecular Phylogenetics and Evolution, 54(3): 1006-1015.
6) Guidetti, R., Peluffo, J.R., Rocha, A.M., Cesari, M. & Moly de Peluffo, M.C. (2013) The morphological and molecular analyses of a new South American urban tardigrade offer new insights on the biological meaning of the Macrobiotus hufelandi group of species (Tardigrada: Macrobiotidae). Journal of Natural History, 47(37-38): 2409-2426.
7) Stec, D., Kristensen, R.M. & Michalczyk, Ł. (2018) Integrative taxonomy identifies Macrobiotus papei, a new tardigrade species of the Macrobiotus hufelandi complex (Eutardigrada: Macrobiotidae) from the Udzungwa Mountains National Park (Tanzania). Zootaxa, 4446(2): 273-291.
8) Stec, D., Smolak, R., Kaczmarek, Ł. & Michalczyk, Ł. (2015) An integrative description of Macrobiotus paulinae sp. nov. (Tardigrada: Eutardigrada: Macrobiotidae: hufelandi group) from Kenya. Zootaxa, 4052(5): 501-526.
9) Welnicz, W., Grohme, M.A., Kaczmarek, Ł., Schill, R.O. & Frohme, M. (2011) ITS-2 and 18S rRNA data from Macrobiotus polonicus and Milnesium tardigradum (Eutardigrada, Tardigrada). Journal of Zoological Systematics and Evolutionary Research, 49(S1): 34-39.
10) Roszkowska, M., Ostrowska, M., Stec, D., Janko, K. & Kaczmarek, Ł. (2017) Macrobiotus polypiformis sp. nov., a new tardigrade (Macrobiotidae; hufelandi group) from the Ecuadorian Pacific coast, with remarks on the claw abnormalities in eutardigrades. European Journal of Taxonomy, 327: 1-19.
11) Schill, R.O. & Steinbruck, G. (2007) Identification and differentiation of Heterotardigrada and Eutardigrada species by riboprinting. Journal of Zoological Systematics and Evolutionary Research, 45(3): 184-190.
12) Stec, D., Morek, W., Gąsiorek, P., Blagden, B. & Michalczyk, Ł. (2017) Description of Macrobiotus scoticus sp. nov. (Tardigrada: Macrobiotidae: hufelandi group) from Scotland by means of integrative taxonomy. Annales Zoologici, 67(2): 181-197.
13) Stec, D., Arakawa, K. & Michalczyk, Ł. (2018) An integrative description of Macrobiotus shonaicus sp. nov. (Tardigrada: Macrobiotidae) from Japan with notes on its phylogenetic position within the hufelandi group. PLoS ONE, 13(2): e0192210.
Table. Estimates of Evolutionary Divergence between Sequences
The number of base differences per site from between sequences are shown. Standard error estimate(s) are shown above the diagonal. The analysis involved 21 nucleotide sequences. Codon positions included were 1st+2nd+3rd+Noncoding. All positions containing gaps and missing data were eliminated. There were a total of 750 positions in the final dataset. Evolutionary analyses were conducted in MEGA7 …
1. Kumar S., Stecher G., and Tamura K. (2016). MEGA7: Molecular Evolutionary Genetics Analysis version 7.0 for bigger datasets.Molecular Biology and Evolution 33:1870-1874.

## Sheet: 28S rRNA
Macrobiotus canaricus Stec, Krzywański & Michalczyk, 2018 (GB: MH063934.1) (1)		0.00728552	0.00475311	0.00617446	0.00991478	0.01055	0.0113398	0.00633108	0.0110177	0.0102067	0.00578764	0.00578764	0.00578764	0.00578764	0.00578764	0.00578764
Macrobiotus hannae Nowak & Stec, 2018 (GB: MH063924.1) (2)	0.0402985		0.00696936	0.00773124	0.0100256	0.0106592	0.0113821	0.0076022	0.0108758	0.010288	0.00736543	0.00736543	0.00736543	0.00736543	0.00736543	0.00736543
Macrobiotus hufelandi group (GB: FJ435751_FJ435754-55) (3)	0.0179104	0.0358209		0.00500684	0.0101561	0.0110639	0.0114384	0.0053627	0.0111622	0.0106865	0.00469083	0.00469083	0.00469083	0.00469083	0.00469083	0.00469083
Macrobiotus macrocalix Bertolani & Rebecchi, 1993 (GB: MH063935.1) (1)	0.0283582	0.0402985	0.0164179		0.0104674	0.0111802	0.0115649	0.00408795	0.0119783	0.0110981	0.00511062	0.00511062	0.00511062	0.00511062	0.00511062	0.00511062
Macrobiotus papei Stec, Kristensen & Michalczyk, 2018 (GB: MH063880.1) (4)	0.0820896	0.0895522	0.0865672	0.0910448		0.00813912	0.00929897	0.010068	0.00903717	0.00702777	0.0102284	0.0102284	0.0102284	0.0102284	0.0102284	0.0102284
Macrobiotus paulinae Stec, Smolak, Kaczmarek & Michalczyk, 2015 (GB: KT935501.1) (5)	0.0865672	0.0835821	0.0925373	0.0955224	0.0462687		0.00883986	0.0110257	0.00863779	0.00809876	0.0111664	0.0111664	0.0111664	0.0111664	0.0111664	0.0111664
Macrobiotus polypiformis Roszkowska, Ostrowska, Stec, Janko & Kaczmarek, 2017 (GB: KX810009.1) (6)	0.11791	0.114925	0.119403	0.122388	0.0686567	0.0671642		0.0115397	0.0103543	0.00994971	0.0116607	0.0116607	0.0116607	0.0116607	0.0116607	0.0116607
Macrobiotus cf. recens (GB: MH063936.1) (1)	0.0298507	0.0447761	0.0208955	0.0134328	0.0880597	0.0955224	0.123881		0.0116882	0.0108139	0.00501024	0.00501024	0.00501024	0.00501024	0.00501024	0.00501024
Macrobiotus scoticus Stec, Morek, Gąsiorek, Blagden & Michalczyk, 2017 (GB: KY797266.1) (7)	0.1	0.107463	0.101493	0.108955	0.0656716	0.0656716	0.0910448	0.107463		0.0090242	0.0113583	0.0113583	0.0113583	0.0113583	0.0113583	0.0113583
Macrobiotus shonaicus Stec, Arakawa & Michalczyk, 2018 (GB: MG757133.1) (8)	0.0865672	0.0940299	0.0955224	0.101493	0.0358209	0.0507463	0.0820896	0.1	0.0671642		0.0109393	0.0109393	0.0109393	0.0109393	0.0109393	0.0109393
1. Macrobiotus basiatus sp. nov. (MT488397)	0.0298507	0.041791	0.0179104	0.019403	0.0865672	0.0955224	0.125373	0.0208955	0.104478	0.0985075		0	0	0	0	0
2. Macrobiotus basiatus sp. nov. (MT488398)	0.0298507	0.041791	0.0179104	0.019403	0.0865672	0.0955224	0.125373	0.0208955	0.104478	0.0985075	0		0	0	0	0
3. Macrobiotus basiatus sp. nov. (MT488399)	0.0298507	0.041791	0.0179104	0.019403	0.0865672	0.0955224	0.125373	0.0208955	0.104478	0.0985075	0	0		0	0	0
4. Macrobiotus basiatus sp. nov. (MT488400)	0.0298507	0.041791	0.0179104	0.019403	0.0865672	0.0955224	0.125373	0.0208955	0.104478	0.0985075	0	0	0		0	0
5. Macrobiotus basiatus sp. nov. (MT488401)	0.0298507	0.041791	0.0179104	0.019403	0.0865672	0.0955224	0.125373	0.0208955	0.104478	0.0985075	0	0	0	0		0
6. Macrobiotus basiatus sp. nov. (MT488402)	0.0298507	0.041791	0.0179104	0.019403	0.0865672	0.0955224	0.125373	0.0208955	0.104478	0.0985075	0	0	0	0	0
1) Stec, D., Krzywański, Ł. & Michalczyk, Ł. (2018) Integrative description of Macrobiotus canaricus sp. nov. with notes on M. recens (Eutardigrada: Macrobiotidae). European Journal of Taxonomy, 452: 1-36.
2) Nowak, B. & Stec, D. (2018) An integrative description of Macrobiotus hannae sp. nov. (Tardigrada: Eutardigrada: Macrobiotidae: hufelandi group) from Poland. Turkish Journal of Zoology, 42: 269-286.
3) Guil, N. & Giribet, G. (2012) A comprehensive molecular phylogeny of tardigrades - adding genes and taxa to a poorly resolved phylum-level phylogeny. Cladistics, 28(1): 21-49.
4) Stec, D., Kristensen, R.M. & Michalczyk, Ł. (2018) Integrative taxonomy identifies Macrobiotus papei, a new tardigrade species of the Macrobiotus hufelandi complex (Eutardigrada: Macrobiotidae) from the Udzungwa Mountains National Park (Tanzania). Zootaxa, 4446(2): 273-291.
5) Stec, D., Smolak, R., Kaczmarek, Ł. & Michalczyk, Ł. (2015) An integrative description of Macrobiotus paulinae sp. nov. (Tardigrada: Eutardigrada: Macrobiotidae: hufelandi group) from Kenya. Zootaxa, 4052(5): 501-526.
6) Roszkowska, M., Ostrowska, M., Stec, D., Janko, K. & Kaczmarek, Ł. (2017) Macrobiotus polypiformis sp. nov., a new tardigrade (Macrobiotidae; hufelandi group) from the Ecuadorian Pacific coast, with remarks on the claw abnormalities in eutardigrades. European Journal of Taxonomy, 327: 1-19.
7) Stec, D., Morek, W., Gąsiorek, P., Blagden, B. & Michalczyk, Ł. (2017) Description of Macrobiotus scoticus sp. nov. (Tardigrada: Macrobiotidae: hufelandi group) from Scotland by means of integrative taxonomy. Annales Zoologici, 67(2): 181-197.
8) Stec, D., Arakawa, K. & Michalczyk, Ł. (2018) An integrative description of Macrobiotus shonaicus sp. nov. (Tardigrada: Macrobiotidae) from Japan with notes on its phylogenetic position within the hufelandi group. PLoS ONE, 13(2): e0192210.
Table. Estimates of Evolutionary Divergence between Sequences
The number of base differences per site from between sequences are shown. Standard error estimate(s) are shown above the diagonal. The analysis involved 16 nucleotide sequences. Codon positions included were 1st+2nd+3rd+Noncoding. All positions containing gaps and missing data were eliminated. There were a total of 670 positions in the final dataset. Evolutionary analyses were conducted in MEGA7 …
1. Kumar S., Stecher G., and Tamura K. (2016). MEGA7: Molecular Evolutionary Genetics Analysis version 7.0 for bigger datasets.Molecular Biology and Evolution 33:1870-1874.
