# Supplementary material for: Two new species of Tardigrada from moss cushions (Grimmia sp.) in a xerothermic habitat in northeast Tennessee (USA, North America), with the first identification of males in the genus Viridiscus
Source: PeerJ. 2020 Nov 23;8:e10251. doi: 10.7717/peerj.10251 (PMC7690296; doi:10.7717/peerj.10251)
Supplement: Supplemental Information 2 [file peerj-08-10251-s002.xls]

## Sheet: instructions
	INSTRUCTIONS and TERMS OF USE
	1	This is a morphometric template for species of the Tardigrada Order Echiniscoidea.
	2	The template caluclates the sc ratio and other relative measures only if all measurements required to calculate a ratio are provided (otherwise the ratio cell remains empty, meaning lack of data). The only numbers you need to enter are absolute measurements in micrometres [μm] in sheets "females", "males", "juveniles" and "larvae". If a structure is not measurable leave the cell empty (enetring z…
	3	Sheets "females", "males", "juveniles" and "larvae" automatically calculate basic statistics (number of measurements, range, mean and SD). The table with these statistics is placed after the last (30th) specimen. The summary table can be then copied and pasted directly to MS Word.
	4	If measurements are done on the type series, please enter the holotype in the first column (this way holotype data are automatically copied to the summary table at end of the sheet). If measurements are not done on the type series, you may delete the last two columns in the summary table. You may change specimen/slide names as desired.
	5	If a trait listed is not present in the species you are measuring, remove the entire row (highlight the row, right mouse click, choose "delete").
	6	Data from sheets "females", "males", "juveniles" and "larvae" are automatically copied to the four remaining "stats" sheets. Data in those sheets are arranged for statistical analyses in the majority of statistical software.
	7	If you want to see the formulas behind this template, press Ctrl+` (usually just before "1" on the keyboard). To return to the value view, press Ctrl+` again.
	8	This template can be freely used but each published use must be credited as Morphometric data were handled using the Echiniscoidea ver. 1.2 template available from the Tardigrada Register, www.tardigrada.net/register (Michalczyk & Kaczmarek 2013). The reference is: Michalczyk, Ł. & Kaczmarek, Ł. (2013) The Tardigrada Register: a comprehensive online data repository for tardigrade taxonomy. Journa…
	9	Copyright by Łukasz Michalczyk. Enquires and suggestions: LM@tardigrada.net

## Sheet: general info
	Species		Genus species
	Population		Country.sample
	Type series		YES/NO
	Author		Name Surname
	Date		DD.MM.YYYY

## Sheet: females
SPECIMEN	1 (HOL) 7.13.95.BA.5		7.14.95.BA.7		7.13.95.BA.6		7.13.95.BA.3		7.12.95.BA.10		7.13.95.BA.1		7.13.95.BA.1		7.13.95.BA.2		7.13.95.BA.2		7.13.95.BA.2		7.13.95.BA.2		7.13.95.BA.1		7.13.95.BA.3		7.13.95.BA.4		7.13.95.BA.14		7.13.95.BA.9		7.13.95.BA.10		7.13.95.BA.13		7.13.95.BA.11		7.13.95.BA.12		7.13.95.BA.12		7.13.95.BA.5		7.13.95.BA.5		7.13.95.BA.5		7.13.95.BA.5
CHARACTER	µm	sc	µm	sc	µm	sc	µm	sc	µm	sc	µm	sc	µm	sc	µm	sc	µm	sc	µm	sc	µm	sc	µm	sc	µm	sc	µm	sc	µm	sc	µm	sc	µm	sc	µm	sc	µm	sc	µm	sc	µm	sc	µm	sc	µm	sc	µm	sc	µm
Body length	191.2	447.775	247	463.415	174.5	478.082	221	455.67	179	455.471	205	452.539	176	458.333	225	472.689	216	450	170	443.864	170	454.545	217	441.057	210	441.176	170	448.549	221	427.466	132.5	440.199	194.8	467.146	231	443.378	191	470.443	210	458.515	211	438.669	154	450.292	196	449.541	219	491.031	217
Scapular plate length	42.7	–	53.3	–	36.5	–	48.5	–	39.3	–	45.3	–	38.4	–	47.6	–	48	–	38.3	–	37.4	–	49.2	–	47.6	–	37.9	–	51.7	–	30.1	–	41.7	–	52.1	–	40.6	–	45.8	–	48.1	–	34.2	–	43.6	–	44.6	–	45.8
Head appendages lengths
Cirrus internus	13.5	31.6159	15.2	28.5178	11	30.137	12.3	25.3608	10.2	25.9542	13.6	30.0221	12.3	32.0313	14.8	31.0924	15.5	32.2917	12.9	33.6815	11	29.4118	15.2	30.8943	14.7	30.8824	11.7	30.8707	17.8	34.4294	8.9	29.5681	12.6	30.2158	17.5	33.5893	12.8	31.5271	12.5	27.2926	15.7	32.6403	11.5	33.6257	12.8	29.3578	13	29.148	12.7
Cephalic papilla	6.1	14.2857			5.8	15.8904	6.9	14.2268	5.6	14.2494	5.7	12.5828	5.7	14.8438	6.4	13.4454	6.8	14.1667	5.4	14.0992	5	13.369	6.4	13.0081	7.2	15.1261	5.1	13.4565	7.1	13.7331	4.2	13.9535	5.5	13.1894	7.6	14.5873	5.7	14.0394	5.7	12.4454	6.5	13.5135	5.4	15.7895	6	13.7615	6	13.4529	6.2
Cirrus externus	14.9	34.8946	17	31.8949	12	32.8767	15.9	32.7835	12	30.5344	15.4	33.9956	13.9	36.1979	15.8	33.1933	17.1	35.625	13.8	36.0313	13.3	35.5615	16	32.5203	17.2	36.1345	13.1	34.5646	21	40.619	10.1	33.5548	13.7	32.8537	18.4	35.3167	14	34.4828	15.1	32.9694			13.3	38.8889	14.3	32.7982	14.2	31.8386	15.1
Clava	5.8	13.5831	6.8	12.758	6	16.4384	6.7	13.8144	5.9	15.0127	6.6	14.5695	5.5	14.3229	6.2	13.0252	6.3	13.125	5.7	14.8825	4.7	12.5668	6.5	13.2114	6.2	13.0252	5.7	15.0396	6.7	12.9594	3.8	12.6246	5.6	13.4293	7.2	13.8196	5.4	13.3005	5.9	12.8821	6.1	12.6819	5	14.6199	5.5	12.6147	5.9	13.2287	6.2
Cirrus A	50.3	117.799	60	112.57	39.9	109.315	51.5	106.186			50	110.375	44	114.583	57.1	119.958	53.8	112.083	46.5	121.41	41.9	112.032	57.4	116.667	54.2	113.866	43.4	114.512	65.4	126.499	31.2	103.654	43.4	104.077	59.8	114.779	48.4	119.212	51	111.354	55.7	115.8	40.4	118.129	54.4	124.771	46.6	104.484	53
Cirrus A/Body length ratio	0.263075	–	0.242915	–	0.228653	–	0.233032	–		–	0.243902	–	0.25	–	0.253778	–	0.249074	–	0.273529	–	0.246471	–	0.264516	–	0.258095	–	0.255294	–	0.295928	–	0.235472	–	0.222793	–	0.258874	–	0.253403	–	0.242857	–	0.263981	–	0.262338	–	0.277551	–	0.212785	–	0.24424
Cirrus int/ext length ratio	0.90604	–	0.894118	–	0.916667	–	0.773585	–	0.85	–	0.883117	–	0.884892	–	0.936709	–	0.906433	–	0.934783	–	0.827068	–	0.95	–	0.854651	–	0.89313	–	0.847619	–	0.881188	–	0.919708	–	0.951087	–	0.914286	–	0.827815	–		–	0.864662	–	0.895105	–	0.915493	–	0.84106
Spine on leg I length	2.8	6.55738	3.4	6.37899	2.6	7.12329	3.2	6.59794	2.7	6.87023			2.3	5.98958	3	6.30252	3	6.25	2.6	6.78851	2.3	6.14973	2.9	5.89431	3.2	6.72269	2.1	5.5409	3.2	6.18956	1.8	5.98007	2.6	6.23501	3.5	6.71785	2.6	6.40394	2.9	6.33188	3.2	6.65281	1.9	5.55556	2.5	5.73394	2.7	6.05381	2.9
Papilla on leg IV length	3.9	9.13349	4.7	8.81801	3.5	9.58904	4.6	9.48454	3.9	9.92366	4	8.83002	4	10.4167	4.2	8.82353	4.4	9.16667	3.8	9.92167	3.4	9.09091	4.4	8.94309	4.3	9.03361			4.3	8.31721			3.7	8.8729			3.6	8.867			4.3	8.93971	3.3	9.64912			3.9	8.74439
Number of teeth on the collar	10	–	9	–	9	–	10	–		–	9	–	9	–	10	–		–	8	–	9	–	10	–	10	–		–	11	–		–	9	–	9	–	9	–	10	–	9	–	10	–	9	–		–	9
Notch length	16.6	38.8759	19.3	36.2101	13	35.6164	18.5	38.1443	15.3	38.9313	17.3	38.1898			17.9	37.605	17.3	36.0417	15.3	39.9478	13.4	35.8289	18.7	38.0081	16.2	34.0336							15.1	36.211			13.8	33.9901	16.9	36.8996	17.3	35.9667	12.5	36.5497	14.8	33.945	17.4	39.0135	18.1
Claw 1 lengths
Branch	14.6	34.192	17.9	33.5835	12.4	33.9726	14.5	29.8969	14	35.6234	14.3	31.5673	12.7	33.0729	14.3	30.042	14.9	31.0417			12.3	32.8877	14.8	30.0813	15.4	32.3529	13	34.3008	16.1	31.1412	10	33.2226			16.4	31.4779	12.8	31.5271	14.2	31.0044			11.7	34.2105
Spur	1.3	3.0445	1.9	3.56473	1.1	3.0137	1.3	2.68041					1.4	3.64583	1.5	3.15126											1.2	3.16623															1.2	3.50877
Spur/branch length ratio	0.0890411	–	0.106145	–	0.0887097	–	0.0896552	–		–		–	0.110236	–	0.104895	–		–		–		–		–		–	0.0923077	–		–		–		–		–		–		–		–	0.102564	–		–		–
Claw 2 lengths
Branch	13.2	30.9133			11.2	30.6849	13.5	27.8351	13.3	33.8422	13.6	30.0221	11.5	29.9479	13.3	27.9412	14.5	30.2083	12.3	32.1149	11.6	31.016	14.7	29.878	15.2	31.9328	13	34.3008	14.6	28.2398	9.8	32.5581	13.2	31.6547					13.8	30.131	14.9	30.9771	11.4	33.3333			12.5	28.0269	14.1
Spur									1.4	3.56234					1.6	3.36134			1.6	4.17755			1.6	3.25203									1.6	3.83693					1.5	3.27511	1.4	2.9106					1.4	3.13901	1.4
Spur/branch length ratio		–		–		–		–	0.105263	–		–		–	0.120301	–		–	0.130081	–		–	0.108844	–		–		–		–		–	0.121212	–		–		–	0.108696	–	0.0939597	–		–		–	0.112	–	0.0992908
Claw 3 lengths
Branch	13.6	31.8501	16.6	31.1445	11.6	31.7808	14	28.866					11.8	30.7292	13.3	27.9412							14.5	29.4715	15.1	31.7227	12.7	33.5092	14.7	28.4333	9.8	32.5581			15.8	30.3263	12.8	31.5271	13.4	29.2576			11.2	32.7485	12.5	28.6697	12.9	28.9238	13.5
Spur	1.3	3.0445			1.4	3.83562									1.2	2.52101							1.5	3.04878	1.5	3.15126																			1.3	2.98165	1.3	2.9148	1.3
Spur/branch length ratio	0.0955882	–		–	0.12069	–		–		–		–		–	0.0902256	–		–		–		–	0.103448	–	0.0993377	–		–		–		–		–		–		–		–		–		–	0.104	–	0.100775	–	0.0962963
Claw 4 lengths
Branch	15.1	35.363	19.7	36.9606	13.5	36.9863	17.3	35.6701	15.7	39.9491			14.7	38.2812	16.8	35.2941			15.6	40.7311	13.5	36.0963			18.2	38.2353	15.4	40.6332	18	34.8162	11.4	37.8738	14.7	35.2518	19.4	37.2361	14.7	36.2069			17.9	37.2141	13.2	38.5965	17	38.9908	15.3	34.3049	16.6
Spur	1.7	3.98126	1.9	3.56473	1.7	4.65753	1.8	3.71134	1.7	4.3257			1.5	3.90625	1.7	3.57143			1.7	4.43864	1.2	3.20856			1.9	3.9916	1.7	4.48549			1.2	3.98671	1.7	4.07674	1.7	3.26296	1.5	3.69458			1.7	3.5343					1.8	4.03587	1.6
Spur/branch length ratio	0.112583	–	0.0964467	–	0.125926	–	0.104046	–	0.10828	–		–	0.102041	–	0.10119	–		–	0.108974	–	0.0888889	–		–	0.104396	–	0.11039	–		–	0.105263	–	0.115646	–	0.0876289	–	0.102041	–		–	0.0949721	–		–		–	0.117647	–	0.0963855
Third median plate (0 = absent; 1 = present)	0		0		0		0		0		0		0		0		0		0		0		0		0		0		0		0		0		0		0		0		0		0		0		0		0
									nie jestem pewny czy ta 3 medialna jest czy nie
[truncated: 25 more columns]

## Sheet: males
SPECIMEN	1 (HOL)		2		3		4		5		6		7		8		9		10		11		12		13		14		15		16		17		18		19		20		21		22		23		24		25
CHARACTER	µm	sc	µm	sc	µm	sc	µm	sc	µm	sc	µm	sc	µm	sc	µm	sc	µm	sc	µm	sc	µm	sc	µm	sc	µm	sc	µm	sc	µm	sc	µm	sc	µm	sc	µm	sc	µm	sc	µm	sc	µm	sc	µm	sc	µm	sc	µm	sc	µm
Body length
Scapular plate length		–		–		–		–		–		–		–		–		–		–		–		–		–		–		–		–		–		–		–		–		–		–		–		–
Head appendages lengths
Cirrus internus
Cephalic papilla
Cirrus externus
Clava
Cirrus A
Cirrus A/Body length ratio		–		–		–		–		–		–		–		–		–		–		–		–		–		–		–		–		–		–		–		–		–		–		–		–
Cirrus int/ext length ratio		–		–		–		–		–		–		–		–		–		–		–		–		–		–		–		–		–		–		–		–		–		–		–		–
Body appendages lengths
Cirrus B
Cirrus Bl
Cirrus Bd
Cirrus C
Cirrus Cl
Cirrus Cd
Cirrus D
Cirrus Dl
Cirrus Dd
Cirrus E
Cirrus El
Cirrus Ed
Spine on leg I length
Spine on leg II length
Spine on leg III length
Papilla on leg IV length
Number of teeth on the collar		–		–		–		–		–		–		–		–		–		–		–		–		–		–		–		–		–		–		–		–		–		–		–		–
Notch length
Claw 1 lengths
Branch
Spur
Spur/branch length ratio		–		–		–		–		–		–		–		–		–		–		–		–		–		–		–		–		–		–		–		–		–		–		–		–
Claw 2 lengths
Branch
Spur
Spur/branch length ratio		–		–		–		–		–		–		–		–		–		–		–		–		–		–		–		–		–		–		–		–		–		–		–		–
Claw 3 lengths
Branch
Spur
Spur/branch length ratio		–		–		–		–		–		–		–		–		–		–		–		–		–		–		–		–		–		–		–		–		–		–		–		–
Claw 4 lengths
Branch
Spur
Spur/branch length ratio		–		–		–		–		–		–		–		–		–		–		–		–		–		–		–		–		–		–		–		–		–		–		–		–
Third median plate (0 = absent; 1 = present)
[truncated: 19 more columns]

## Sheet: juveniles
SPECIMEN	1 (HOL)		2		3		4		5		6		7		8		9		10		11		12		13		14		15		16		17		18		19		20		21		22		23		24		25
CHARACTER	µm	sc	µm	sc	µm	sc	µm	sc	µm	sc	µm	sc	µm	sc	µm	sc	µm	sc	µm	sc	µm	sc	µm	sc	µm	sc	µm	sc	µm	sc	µm	sc	µm	sc	µm	sc	µm	sc	µm	sc	µm	sc	µm	sc	µm	sc	µm	sc	µm
Body length
Scapular plate length		–		–		–		–		–		–		–		–		–		–		–		–		–		–		–		–		–		–		–		–		–		–		–		–
Head appendages lengths
Cirrus internus
Cephalic papilla
Cirrus externus
Clava
Cirrus A
Cirrus A/Body length ratio		–		–		–		–		–		–		–		–		–		–		–		–		–		–		–		–		–		–		–		–		–		–		–		–
Cirrus int/ext length ratio		–		–		–		–		–		–		–		–		–		–		–		–		–		–		–		–		–		–		–		–		–		–		–		–
Body appendages lengths
Cirrus B
Cirrus Bl
Cirrus Bd
Cirrus C
Cirrus Cl
Cirrus Cd
Cirrus D
Cirrus Dl
Cirrus Dd
Cirrus E
Cirrus El
Cirrus Ed
Spine on leg I length
Spine on leg II length
Spine on leg III length
Papilla on leg IV length
Number of teeth on the collar		–		–		–		–		–		–		–		–		–		–		–		–		–		–		–		–		–		–		–		–		–		–		–		–
Notch length
Claw 1 lengths
Branch
Spur
Spur/branch length ratio		–		–		–		–		–		–		–		–		–		–		–		–		–		–		–		–		–		–		–		–		–		–		–		–
Claw 2 lengths
Branch
Spur
Spur/branch length ratio		–		–		–		–		–		–		–		–		–		–		–		–		–		–		–		–		–		–		–		–		–		–		–		–
Claw 3 lengths
Branch
Spur
Spur/branch length ratio		–		–		–		–		–		–		–		–		–		–		–		–		–		–		–		–		–		–		–		–		–		–		–		–
Claw 4 lengths
Branch
Spur
Spur/branch length ratio		–		–		–		–		–		–		–		–		–		–		–		–		–		–		–		–		–		–		–		–		–		–		–		–
Third median plate (0 = absent; 1 = present)
[truncated: 19 more columns]

## Sheet: larvae
SPECIMEN	1 (HOL)		2		3		4		5		6		7		8		9		10		11		12		13		14		15		16		17		18		19		20		21		22		23		24		25
CHARACTER	µm	sc	µm	sc	µm	sc	µm	sc	µm	sc	µm	sc	µm	sc	µm	sc	µm	sc	µm	sc	µm	sc	µm	sc	µm	sc	µm	sc	µm	sc	µm	sc	µm	sc	µm	sc	µm	sc	µm	sc	µm	sc	µm	sc	µm	sc	µm	sc	µm
Body length
Scapular plate length		–		–		–		–		–		–		–		–		–		–		–		–		–		–		–		–		–		–		–		–		–		–		–		–
Head appendages lengths
Cirrus internus
Cephalic papilla
Cirrus externus
Clava
Cirrus A
Cirrus A/Body length ratio		–		–		–		–		–		–		–		–		–		–		–		–		–		–		–		–		–		–		–		–		–		–		–		–
Cirrus int/ext length ratio		–		–		–		–		–		–		–		–		–		–		–		–		–		–		–		–		–		–		–		–		–		–		–		–
Body appendages lengths
Cirrus B
Cirrus Bl
Cirrus Bd
Cirrus C
Cirrus Cl
Cirrus Cd
Cirrus D
Cirrus Dl
Cirrus Dd
Cirrus E
Cirrus El
Cirrus Ed
Spine on leg I length
Spine on leg II length
Spine on leg III length
Papilla on leg IV length
Number of teeth on the collar		–		–		–		–		–		–		–		–		–		–		–		–		–		–		–		–		–		–		–		–		–		–		–		–
Notch length
Claw 1 lengths
Branch
Spur
Spur/branch length ratio		–		–		–		–		–		–		–		–		–		–		–		–		–		–		–		–		–		–		–		–		–		–		–		–
Claw 2 lengths
Branch
Spur
Spur/branch length ratio		–		–		–		–		–		–		–		–		–		–		–		–		–		–		–		–		–		–		–		–		–		–		–		–
Claw 3 lengths
Branch
Spur
Spur/branch length ratio		–		–		–		–		–		–		–		–		–		–		–		–		–		–		–		–		–		–		–		–		–		–		–		–
Claw 4 lengths
Branch
Spur
Spur/branch length ratio		–		–		–		–		–		–		–		–		–		–		–		–		–		–		–		–		–		–		–		–		–		–		–		–
Third median plate (0 = absent; 1 = present)
[truncated: 19 more columns]

## Sheet: females_stats (μm)
Species	Population	Individual	Body length	Scapular plate length	Cirrus internus	Cephalic papilla	Cirrus externus	Clava	Cirrus A	Cirrus A/Body length ratio	Cirrus int/ext length ratio	Cirrus B	Cirrus Bl	Cirrus Bd	Cirrus C	Cirrus Cl	Cirrus Cd	Cirrus D	Cirrus Dl	Cirrus Dd	Cirrus E	Cirrus El	Cirrus Ed	Spine on leg I length	Spine on leg II length	Spine on leg III length	Papilla on leg IV length	Number of teeth on the collar	Notch length	Claw 1 branch	Claw 1 spur	Claw 1 spur/branch length ratio	Claw 2 branch	Claw 2 spur	Claw 2 spur/branch length ratio	Claw 3 branch	Claw 3 spur	Claw 3 spur/branch length ratio	Claw 4 branch	Claw 4 spur	Claw 4 spur/branch length ratio
Genus species	Country.sample	1 (HOL) 7.13.95.BA.5	191.2	42.7	13.5	6.1	14.9	5.8	50.3	0.263075	0.90604	#REF!	#REF!	#REF!	#REF!	#REF!	#REF!	#REF!	#REF!	#REF!	#REF!	#REF!	#REF!	2.8	#REF!	#REF!	3.9	10	16.6	14.6	1.3	0.0890411	13.2			13.6	1.3	0.0955882	15.1	1.7	0.112583
Genus species	Country.sample	7.14.95.BA.7	247	53.3	15.2		17	6.8	60	0.242915	0.894118	#REF!	#REF!	#REF!	#REF!	#REF!	#REF!	#REF!	#REF!	#REF!	#REF!	#REF!	#REF!	3.4	#REF!	#REF!	4.7	9	19.3	17.9	1.9	0.106145				16.6			19.7	1.9	0.0964467
Genus species	Country.sample	7.13.95.BA.6	174.5	36.5	11	5.8	12	6	39.9	0.228653	0.916667	#REF!	#REF!	#REF!	#REF!	#REF!	#REF!	#REF!	#REF!	#REF!	#REF!	#REF!	#REF!	2.6	#REF!	#REF!	3.5	9	13	12.4	1.1	0.0887097	11.2			11.6	1.4	0.12069	13.5	1.7	0.125926
Genus species	Country.sample	7.13.95.BA.3	221	48.5	12.3	6.9	15.9	6.7	51.5	0.233032	0.773585	#REF!	#REF!	#REF!	#REF!	#REF!	#REF!	#REF!	#REF!	#REF!	#REF!	#REF!	#REF!	3.2	#REF!	#REF!	4.6	10	18.5	14.5	1.3	0.0896552	13.5			14			17.3	1.8	0.104046
Genus species	Country.sample	7.12.95.BA.10	179	39.3	10.2	5.6	12	5.9			0.85	#REF!	#REF!	#REF!	#REF!	#REF!	#REF!	#REF!	#REF!	#REF!	#REF!	#REF!	#REF!	2.7	#REF!	#REF!	3.9		15.3	14			13.3	1.4	0.105263				15.7	1.7	0.10828
Genus species	Country.sample	7.13.95.BA.1	205	45.3	13.6	5.7	15.4	6.6	50	0.243902	0.883117	#REF!	#REF!	#REF!	#REF!	#REF!	#REF!	#REF!	#REF!	#REF!	#REF!	#REF!	#REF!		#REF!	#REF!	4	9	17.3	14.3			13.6
Genus species	Country.sample	7.13.95.BA.1	176	38.4	12.3	5.7	13.9	5.5	44	0.25	0.884892	#REF!	#REF!	#REF!	#REF!	#REF!	#REF!	#REF!	#REF!	#REF!	#REF!	#REF!	#REF!	2.3	#REF!	#REF!	4	9		12.7	1.4	0.110236	11.5			11.8			14.7	1.5	0.102041
Genus species	Country.sample	7.13.95.BA.2	225	47.6	14.8	6.4	15.8	6.2	57.1	0.253778	0.936709	#REF!	#REF!	#REF!	#REF!	#REF!	#REF!	#REF!	#REF!	#REF!	#REF!	#REF!	#REF!	3	#REF!	#REF!	4.2	10	17.9	14.3	1.5	0.104895	13.3	1.6	0.120301	13.3	1.2	0.0902256	16.8	1.7	0.10119
Genus species	Country.sample	7.13.95.BA.2	216	48	15.5	6.8	17.1	6.3	53.8	0.249074	0.906433	#REF!	#REF!	#REF!	#REF!	#REF!	#REF!	#REF!	#REF!	#REF!	#REF!	#REF!	#REF!	3	#REF!	#REF!	4.4		17.3	14.9			14.5
Genus species	Country.sample	7.13.95.BA.2	170	38.3	12.9	5.4	13.8	5.7	46.5	0.273529	0.934783	#REF!	#REF!	#REF!	#REF!	#REF!	#REF!	#REF!	#REF!	#REF!	#REF!	#REF!	#REF!	2.6	#REF!	#REF!	3.8	8	15.3				12.3	1.6	0.130081				15.6	1.7	0.108974
Genus species	Country.sample	7.13.95.BA.2	170	37.4	11	5	13.3	4.7	41.9	0.246471	0.827068	#REF!	#REF!	#REF!	#REF!	#REF!	#REF!	#REF!	#REF!	#REF!	#REF!	#REF!	#REF!	2.3	#REF!	#REF!	3.4	9	13.4	12.3			11.6						13.5	1.2	0.0888889
Genus species	Country.sample	7.13.95.BA.1	217	49.2	15.2	6.4	16	6.5	57.4	0.264516	0.95	#REF!	#REF!	#REF!	#REF!	#REF!	#REF!	#REF!	#REF!	#REF!	#REF!	#REF!	#REF!	2.9	#REF!	#REF!	4.4	10	18.7	14.8			14.7	1.6	0.108844	14.5	1.5	0.103448
Genus species	Country.sample	7.13.95.BA.3	210	47.6	14.7	7.2	17.2	6.2	54.2	0.258095	0.854651	#REF!	#REF!	#REF!	#REF!	#REF!	#REF!	#REF!	#REF!	#REF!	#REF!	#REF!	#REF!	3.2	#REF!	#REF!	4.3	10	16.2	15.4			15.2			15.1	1.5	0.0993377	18.2	1.9	0.104396
Genus species	Country.sample	7.13.95.BA.4	170	37.9	11.7	5.1	13.1	5.7	43.4	0.255294	0.89313	#REF!	#REF!	#REF!	#REF!	#REF!	#REF!	#REF!	#REF!	#REF!	#REF!	#REF!	#REF!	2.1	#REF!	#REF!				13	1.2	0.0923077	13			12.7			15.4	1.7	0.11039
Genus species	Country.sample	7.13.95.BA.14	221	51.7	17.8	7.1	21	6.7	65.4	0.295928	0.847619	#REF!	#REF!	#REF!	#REF!	#REF!	#REF!	#REF!	#REF!	#REF!	#REF!	#REF!	#REF!	3.2	#REF!	#REF!	4.3	11		16.1			14.6			14.7			18
Genus species	Country.sample	7.13.95.BA.9	132.5	30.1	8.9	4.2	10.1	3.8	31.2	0.235472	0.881188	#REF!	#REF!	#REF!	#REF!	#REF!	#REF!	#REF!	#REF!	#REF!	#REF!	#REF!	#REF!	1.8	#REF!	#REF!				10			9.8			9.8			11.4	1.2	0.105263
Genus species	Country.sample	7.13.95.BA.10	194.8	41.7	12.6	5.5	13.7	5.6	43.4	0.222793	0.919708	#REF!	#REF!	#REF!	#REF!	#REF!	#REF!	#REF!	#REF!	#REF!	#REF!	#REF!	#REF!	2.6	#REF!	#REF!	3.7	9	15.1				13.2	1.6	0.121212				14.7	1.7	0.115646
Genus species	Country.sample	7.13.95.BA.13	231	52.1	17.5	7.6	18.4	7.2	59.8	0.258874	0.951087	#REF!	#REF!	#REF!	#REF!	#REF!	#REF!	#REF!	#REF!	#REF!	#REF!	#REF!	#REF!	3.5	#REF!	#REF!		9		16.4						15.8			19.4	1.7	0.0876289
Genus species	Country.sample	7.13.95.BA.11	191	40.6	12.8	5.7	14	5.4	48.4	0.253403	0.914286	#REF!	#REF!	#REF!	#REF!	#REF!	#REF!	#REF!	#REF!	#REF!	#REF!	#REF!	#REF!	2.6	#REF!	#REF!	3.6	9	13.8	12.8						12.8			14.7	1.5	0.102041
Genus species	Country.sample	7.13.95.BA.12	210	45.8	12.5	5.7	15.1	5.9	51	0.242857	0.827815	#REF!	#REF!	#REF!	#REF!	#REF!	#REF!	#REF!	#REF!	#REF!	#REF!	#REF!	#REF!	2.9	#REF!	#REF!		10	16.9	14.2			13.8	1.5	0.108696	13.4
Genus species	Country.sample	7.13.95.BA.12	211	48.1	15.7	6.5		6.1	55.7	0.263981		#REF!	#REF!	#REF!	#REF!	#REF!	#REF!	#REF!	#REF!	#REF!	#REF!	#REF!	#REF!	3.2	#REF!	#REF!	4.3	9	17.3				14.9	1.4	0.0939597				17.9	1.7	0.0949721
Genus species	Country.sample	7.13.95.BA.5	154	34.2	11.5	5.4	13.3	5	40.4	0.262338	0.864662	#REF!	#REF!	#REF!	#REF!	#REF!	#REF!	#REF!	#REF!	#REF!	#REF!	#REF!	#REF!	1.9	#REF!	#REF!	3.3	10	12.5	11.7	1.2	0.102564	11.4			11.2			13.2
Genus species	Country.sample	7.13.95.BA.5	196	43.6	12.8	6	14.3	5.5	54.4	0.277551	0.895105	#REF!	#REF!	#REF!	#REF!	#REF!	#REF!	#REF!	#REF!	#REF!	#REF!	#REF!	#REF!	2.5	#REF!	#REF!		9	14.8							12.5	1.3	0.104	17
Genus species	Country.sample	7.13.95.BA.5	219	44.6	13	6	14.2	5.9	46.6	0.212785	0.915493	#REF!	#REF!	#REF!	#REF!	#REF!	#REF!	#REF!	#REF!	#REF!	#REF!	#REF!	#REF!	2.7	#REF!	#REF!	3.9		17.4				12.5	1.4	0.112	12.9	1.3	0.100775	15.3	1.8	0.117647
Genus species	Country.sample	7.13.95.BA.5	217	45.8	12.7	6.2	15.1	6.2	53	0.24424	0.84106	#REF!	#REF!	#REF!	#REF!	#REF!	#REF!	#REF!	#REF!	#REF!	#REF!	#REF!	#REF!	2.9	#REF!	#REF!		9	18.1				14.1	1.4	0.0992908	13.5	1.3	0.0962963	16.6	1.6	0.0963855
Genus species	Country.sample	7.13.95.BA.5	208	45.8	14.3	6.3	16	5.8	56	0.269231	0.89375	#REF!	#REF!	#REF!	#REF!	#REF!	#REF!	#REF!	#REF!	#REF!	#REF!	#REF!	#REF!	3	#REF!	#REF!	3.9	10	16.2	15.3						14.2			17	1.8	0.105882
Genus species	Country.sample	7.13.95.BA.4	229	49.3	16.3	7.2	18.9	6.4	61.5	0.268559	0.862434	#REF!	#REF!	#REF!	#REF!	#REF!	#REF!	#REF!	#REF!	#REF!	#REF!	#REF!	#REF!	2.8	#REF!	#REF!	4.3	9		15.3	1.6	0.104575	15.4	1.7	0.11039	14.5	1.5	0.103448	17.7
Genus species	Country.sample	7.13.95.BA.4	143	31	9.2	4.4	10	4.3			0.92	#REF!	#REF!	#REF!	#REF!	#REF!	#REF!	#REF!	#REF!	#REF!	#REF!	#REF!	#REF!	1.9	#REF!	#REF!	3	8	11.4	10.1			9	0.9	0.1
Genus species	Country.sample	7.13.95.BA.4	232	49.1	16.9	7.1	18	6.3	56.8	0.244828	0.938889	#REF!	#REF!	#REF!	#REF!	#REF!	#REF!	#REF!	#REF!	#REF!	#REF!	#REF!	#REF!	3.4	#REF!	#REF!	4.1	9	17.3	16			15.4	1.4	0.0909091				18.1	2.1	0.116022
Genus species	Country.sample	7.13.95.BA.4	239	49.6	15.6	7.5	16.3	6.5			0.957055	#REF!	#REF!	#REF!	#REF!	#REF!	#REF!	#REF!	#REF!	#REF!	#REF!	#REF!	#REF!	2.9	#REF!	#REF!		10	16.9	15.2	1.7	0.111842							18.3

## Sheet: females_stats (sc)
Species	Population	Individual	Body length	Cirrus internus	Cephalic papilla	Cirrus externus	Clava	Cirrus A	Cirrus B	Cirrus Bl	Cirrus Bd	Cirrus C	Cirrus Cl	Cirrus Cd	Cirrus D	Cirrus Dl	Cirrus Dd	Cirrus E	Cirrus El	Cirrus Ed	Spine on leg I length	Spine on leg II length	Spine on leg III length	Papilla on leg IV length	Notch length	Claw 1 branch	Claw 1 spur	Claw 2 branch	Claw 2 spur	Claw 3 branch	Claw 3 spur	Claw 4 branch	Claw 4 spur
Genus species	Country.sample	1 (HOL) 7.13.95.BA.5	447.775	31.6159	14.2857	34.8946	13.5831	117.799	#REF!	#REF!	#REF!	#REF!	#REF!	#REF!	#REF!	#REF!	#REF!	#REF!	#REF!	#REF!	6.55738	#REF!	#REF!	9.13349	38.8759	34.192	3.0445	30.9133		31.8501	3.0445	35.363	3.98126
Genus species	Country.sample	7.14.95.BA.7	463.415	28.5178		31.8949	12.758	112.57	#REF!	#REF!	#REF!	#REF!	#REF!	#REF!	#REF!	#REF!	#REF!	#REF!	#REF!	#REF!	6.37899	#REF!	#REF!	8.81801	36.2101	33.5835	3.56473			31.1445		36.9606	3.56473
Genus species	Country.sample	7.13.95.BA.6	478.082	30.137	15.8904	32.8767	16.4384	109.315	#REF!	#REF!	#REF!	#REF!	#REF!	#REF!	#REF!	#REF!	#REF!	#REF!	#REF!	#REF!	7.12329	#REF!	#REF!	9.58904	35.6164	33.9726	3.0137	30.6849		31.7808	3.83562	36.9863	4.65753
Genus species	Country.sample	7.13.95.BA.3	455.67	25.3608	14.2268	32.7835	13.8144	106.186	#REF!	#REF!	#REF!	#REF!	#REF!	#REF!	#REF!	#REF!	#REF!	#REF!	#REF!	#REF!	6.59794	#REF!	#REF!	9.48454	38.1443	29.8969	2.68041	27.8351		28.866		35.6701	3.71134
Genus species	Country.sample	7.12.95.BA.10	455.471	25.9542	14.2494	30.5344	15.0127		#REF!	#REF!	#REF!	#REF!	#REF!	#REF!	#REF!	#REF!	#REF!	#REF!	#REF!	#REF!	6.87023	#REF!	#REF!	9.92366	38.9313	35.6234		33.8422	3.56234			39.9491	4.3257
Genus species	Country.sample	7.13.95.BA.1	452.539	30.0221	12.5828	33.9956	14.5695	110.375	#REF!	#REF!	#REF!	#REF!	#REF!	#REF!	#REF!	#REF!	#REF!	#REF!	#REF!	#REF!		#REF!	#REF!	8.83002	38.1898	31.5673		30.0221
Genus species	Country.sample	7.13.95.BA.1	458.333	32.0313	14.8438	36.1979	14.3229	114.583	#REF!	#REF!	#REF!	#REF!	#REF!	#REF!	#REF!	#REF!	#REF!	#REF!	#REF!	#REF!	5.98958	#REF!	#REF!	10.4167		33.0729	3.64583	29.9479		30.7292		38.2812	3.90625
Genus species	Country.sample	7.13.95.BA.2	472.689	31.0924	13.4454	33.1933	13.0252	119.958	#REF!	#REF!	#REF!	#REF!	#REF!	#REF!	#REF!	#REF!	#REF!	#REF!	#REF!	#REF!	6.30252	#REF!	#REF!	8.82353	37.605	30.042	3.15126	27.9412	3.36134	27.9412	2.52101	35.2941	3.57143
Genus species	Country.sample	7.13.95.BA.2	450	32.2917	14.1667	35.625	13.125	112.083	#REF!	#REF!	#REF!	#REF!	#REF!	#REF!	#REF!	#REF!	#REF!	#REF!	#REF!	#REF!	6.25	#REF!	#REF!	9.16667	36.0417	31.0417		30.2083
Genus species	Country.sample	7.13.95.BA.2	443.864	33.6815	14.0992	36.0313	14.8825	121.41	#REF!	#REF!	#REF!	#REF!	#REF!	#REF!	#REF!	#REF!	#REF!	#REF!	#REF!	#REF!	6.78851	#REF!	#REF!	9.92167	39.9478			32.1149	4.17755			40.7311	4.43864
Genus species	Country.sample	7.13.95.BA.2	454.545	29.4118	13.369	35.5615	12.5668	112.032	#REF!	#REF!	#REF!	#REF!	#REF!	#REF!	#REF!	#REF!	#REF!	#REF!	#REF!	#REF!	6.14973	#REF!	#REF!	9.09091	35.8289	32.8877		31.016				36.0963	3.20856
Genus species	Country.sample	7.13.95.BA.1	441.057	30.8943	13.0081	32.5203	13.2114	116.667	#REF!	#REF!	#REF!	#REF!	#REF!	#REF!	#REF!	#REF!	#REF!	#REF!	#REF!	#REF!	5.89431	#REF!	#REF!	8.94309	38.0081	30.0813		29.878	3.25203	29.4715	3.04878
Genus species	Country.sample	7.13.95.BA.3	441.176	30.8824	15.1261	36.1345	13.0252	113.866	#REF!	#REF!	#REF!	#REF!	#REF!	#REF!	#REF!	#REF!	#REF!	#REF!	#REF!	#REF!	6.72269	#REF!	#REF!	9.03361	34.0336	32.3529		31.9328		31.7227	3.15126	38.2353	3.9916
Genus species	Country.sample	7.13.95.BA.4	448.549	30.8707	13.4565	34.5646	15.0396	114.512	#REF!	#REF!	#REF!	#REF!	#REF!	#REF!	#REF!	#REF!	#REF!	#REF!	#REF!	#REF!	5.5409	#REF!	#REF!			34.3008	3.16623	34.3008		33.5092		40.6332	4.48549
Genus species	Country.sample	7.13.95.BA.14	427.466	34.4294	13.7331	40.619	12.9594	126.499	#REF!	#REF!	#REF!	#REF!	#REF!	#REF!	#REF!	#REF!	#REF!	#REF!	#REF!	#REF!	6.18956	#REF!	#REF!	8.31721		31.1412		28.2398		28.4333		34.8162
Genus species	Country.sample	7.13.95.BA.9	440.199	29.5681	13.9535	33.5548	12.6246	103.654	#REF!	#REF!	#REF!	#REF!	#REF!	#REF!	#REF!	#REF!	#REF!	#REF!	#REF!	#REF!	5.98007	#REF!	#REF!			33.2226		32.5581		32.5581		37.8738	3.98671
Genus species	Country.sample	7.13.95.BA.10	467.146	30.2158	13.1894	32.8537	13.4293	104.077	#REF!	#REF!	#REF!	#REF!	#REF!	#REF!	#REF!	#REF!	#REF!	#REF!	#REF!	#REF!	6.23501	#REF!	#REF!	8.8729	36.211			31.6547	3.83693			35.2518	4.07674
Genus species	Country.sample	7.13.95.BA.13	443.378	33.5893	14.5873	35.3167	13.8196	114.779	#REF!	#REF!	#REF!	#REF!	#REF!	#REF!	#REF!	#REF!	#REF!	#REF!	#REF!	#REF!	6.71785	#REF!	#REF!			31.4779				30.3263		37.2361	3.26296
Genus species	Country.sample	7.13.95.BA.11	470.443	31.5271	14.0394	34.4828	13.3005	119.212	#REF!	#REF!	#REF!	#REF!	#REF!	#REF!	#REF!	#REF!	#REF!	#REF!	#REF!	#REF!	6.40394	#REF!	#REF!	8.867	33.9901	31.5271				31.5271		36.2069	3.69458
Genus species	Country.sample	7.13.95.BA.12	458.515	27.2926	12.4454	32.9694	12.8821	111.354	#REF!	#REF!	#REF!	#REF!	#REF!	#REF!	#REF!	#REF!	#REF!	#REF!	#REF!	#REF!	6.33188	#REF!	#REF!		36.8996	31.0044		30.131	3.27511	29.2576
Genus species	Country.sample	7.13.95.BA.12	438.669	32.6403	13.5135		12.6819	115.8	#REF!	#REF!	#REF!	#REF!	#REF!	#REF!	#REF!	#REF!	#REF!	#REF!	#REF!	#REF!	6.65281	#REF!	#REF!	8.93971	35.9667			30.9771	2.9106			37.2141	3.5343
Genus species	Country.sample	7.13.95.BA.5	450.292	33.6257	15.7895	38.8889	14.6199	118.129	#REF!	#REF!	#REF!	#REF!	#REF!	#REF!	#REF!	#REF!	#REF!	#REF!	#REF!	#REF!	5.55556	#REF!	#REF!	9.64912	36.5497	34.2105	3.50877	33.3333		32.7485		38.5965
Genus species	Country.sample	7.13.95.BA.5	449.541	29.3578	13.7615	32.7982	12.6147	124.771	#REF!	#REF!	#REF!	#REF!	#REF!	#REF!	#REF!	#REF!	#REF!	#REF!	#REF!	#REF!	5.73394	#REF!	#REF!		33.945					28.6697	2.98165	38.9908
Genus species	Country.sample	7.13.95.BA.5	491.031	29.148	13.4529	31.8386	13.2287	104.484	#REF!	#REF!	#REF!	#REF!	#REF!	#REF!	#REF!	#REF!	#REF!	#REF!	#REF!	#REF!	6.05381	#REF!	#REF!	8.74439	39.0135			28.0269	3.13901	28.9238	2.9148	34.3049	4.03587
Genus species	Country.sample	7.13.95.BA.5	473.799	27.7293	13.5371	32.9694	13.5371	115.721	#REF!	#REF!	#REF!	#REF!	#REF!	#REF!	#REF!	#REF!	#REF!	#REF!	#REF!	#REF!	6.33188	#REF!	#REF!		39.5197			30.786	3.05677	29.476	2.83843	36.2445	3.49345
Genus species	Country.sample	7.13.95.BA.5	454.148	31.2227	13.7555	34.9345	12.6638	122.271	#REF!	#REF!	#REF!	#REF!	#REF!	#REF!	#REF!	#REF!	#REF!	#REF!	#REF!	#REF!	6.55022	#REF!	#REF!	8.51528	35.3712	33.4061				31.0044		37.1179	3.93013
Genus species	Country.sample	7.13.95.BA.4	464.503	33.0629	14.6045	38.3367	12.9817	124.746	#REF!	#REF!	#REF!	#REF!	#REF!	#REF!	#REF!	#REF!	#REF!	#REF!	#REF!	#REF!	5.67951	#REF!	#REF!	8.72211		31.0345	3.24544	31.2373	3.44828	29.4118	3.0426	35.9026
Genus species	Country.sample	7.13.95.BA.4	461.29	29.6774	14.1935	32.2581	13.871		#REF!	#REF!	#REF!	#REF!	#REF!	#REF!	#REF!	#REF!	#REF!	#REF!	#REF!	#REF!	6.12903	#REF!	#REF!	9.67742	36.7742	32.5806		29.0323	2.90323
Genus species	Country.sample	7.13.95.BA.4	472.505	34.4196	14.4603	36.6599	12.831	115.682	#REF!	#REF!	#REF!	#REF!	#REF!	#REF!	#REF!	#REF!	#REF!	#REF!	#REF!	#REF!	6.92464	#REF!	#REF!	8.35031	35.2342	32.5866		31.3646	2.85132			36.8635	4.27699
Genus species	Country.sample	7.13.95.BA.4	481.855	31.4516	15.121	32.8629	13.1048		#REF!	#REF!	#REF!	#REF!	#REF!	#REF!	#REF!	#REF!	#REF!	#REF!	#REF!	#REF!	5.84677	#REF!	#REF!		34.0726	30.6452	3.42742					36.8952

## Sheet: males_stats (μm)
Species	Population	Individual	Body length	Scapular plate length	Cirrus internus	Cephalic papilla	Cirrus externus	Clava	Cirrus A	Cirrus A/Body length ratio	Cirrus int/ext length ratio	Cirrus B	Cirrus Bl	Cirrus Bd	Cirrus C	Cirrus Cl	Cirrus Cd	Cirrus D	Cirrus Dl	Cirrus Dd	Cirrus E	Cirrus El	Cirrus Ed	Spine on leg I length	Spine on leg II length	Spine on leg III length	Papilla on leg IV length	Number of teeth on the collar	Notch length	Claw 1 branch	Claw 1 spur	Claw 1 spur/branch length ratio	Claw 2 branch	Claw 2 spur	Claw 2 spur/branch length ratio	Claw 3 branch	Claw 3 spur	Claw 3 spur/branch length ratio	Claw 4 branch	Claw 4 spur	Claw 4 spur/branch length ratio
Genus species	Country.sample	1 (HOL)
Genus species	Country.sample	2
Genus species	Country.sample	3
Genus species	Country.sample	4
Genus species	Country.sample	5
Genus species	Country.sample	6
Genus species	Country.sample	7
Genus species	Country.sample	8
Genus species	Country.sample	9
Genus species	Country.sample	10
Genus species	Country.sample	11
Genus species	Country.sample	12
Genus species	Country.sample	13
Genus species	Country.sample	14
Genus species	Country.sample	15
Genus species	Country.sample	16
Genus species	Country.sample	17
Genus species	Country.sample	18
Genus species	Country.sample	19
Genus species	Country.sample	20
Genus species	Country.sample	21
Genus species	Country.sample	22
Genus species	Country.sample	23
Genus species	Country.sample	24
Genus species	Country.sample	25
Genus species	Country.sample	26
Genus species	Country.sample	27
Genus species	Country.sample	28
Genus species	Country.sample	29
Genus species	Country.sample	30

## Sheet: males_stats (sc)
Species	Population	Individual	Body length	Cirrus internus	Cephalic papilla	Cirrus externus	Clava	Cirrus A	Cirrus B	Cirrus Bl	Cirrus Bd	Cirrus C	Cirrus Cl	Cirrus Cd	Cirrus D	Cirrus Dl	Cirrus Dd	Cirrus E	Cirrus El	Cirrus Ed	Spine on leg I length	Spine on leg II length	Spine on leg III length	Papilla on leg IV length	Notch length	Claw 1 branch	Claw 1 spur	Claw 2 branch	Claw 2 spur	Claw 3 branch	Claw 3 spur	Claw 4 branch	Claw 4 spur
Genus species	Country.sample	1 (HOL)
Genus species	Country.sample	2
Genus species	Country.sample	3
Genus species	Country.sample	4
Genus species	Country.sample	5
Genus species	Country.sample	6
Genus species	Country.sample	7
Genus species	Country.sample	8
Genus species	Country.sample	9
Genus species	Country.sample	10
Genus species	Country.sample	11
Genus species	Country.sample	12
Genus species	Country.sample	13
Genus species	Country.sample	14
Genus species	Country.sample	15
Genus species	Country.sample	16
Genus species	Country.sample	17
Genus species	Country.sample	18
Genus species	Country.sample	19
Genus species	Country.sample	20
Genus species	Country.sample	21
Genus species	Country.sample	22
Genus species	Country.sample	23
Genus species	Country.sample	24
Genus species	Country.sample	25
Genus species	Country.sample	26
Genus species	Country.sample	27
Genus species	Country.sample	28
Genus species	Country.sample	29
Genus species	Country.sample	30

[truncated: 4 more sheets: juveniles_stats (μm), juvenles_stats (sc), larvae_stats (μm), larvae_stats (sc)]
