# Supplementary material for: Two new species of Tardigrada from moss cushions (Grimmia sp.) in a xerothermic habitat in northeast Tennessee (USA, North America), with the first identification of males in the genus Viridiscus
Source: PeerJ. 2020 Nov 23;8:e10251. doi: 10.7717/peerj.10251 (PMC7690296; doi:10.7717/peerj.10251)
Supplement: Supplemental Information 3 [file peerj-08-10251-s003.xls]

## Sheet: instructions
	INSTRUCTIONS and TERMS OF USE
	1	This is a morphometric template for species of the Tardigrada Order Parachela.
	2	The template caluclates the pt ratio and other relative measures only if all measurements required to calculate a ratio are provided (otherwise the ratio cell remains empty, meaning lack of data). The only numbers you need to enter are absolute measurements in micrometres [μm] in the sheet "individuals". If a structure is not measurable leave the cell empty (enetring zeros will mean that the trai…
	3	The "individuals" sheet automatically calculates basic statistics (number of measurements, range, mean and SD). The table with these statistics is placed after the last (30th) specimen. The summary table can be then copied and pasted directly to MS Word.
	4	If measurements are done on the type series, please enter the holotype in the first column (this way holotype data are automatically copied to the summary table at end of the sheet). If measurements are not done on the type series, you may delete the last two columns in the summary table. You may change specimen/slide names as desired.
	5	If a trait listed is not present in the species you are measuring, remove the entire row (highlight the row, right mouse click, choose "delete").
	6	Data from the sheet "individuals" are automatically copied to the four remaining "stats" sheets. Data in those sheets are arranged for statistical analyses in the majority of statistical software.
	7	If you want to see the formulas behind this template, press Ctrl+` (usually just before "1" on the keyboard). To return to the value view, press Ctrl+` again.
	8	This template can be freely used but each published use must be credited as Morphometric data were handled using the Parachela ver. 1.2 template available from the Tardigrada Register, www.tardigrada.net/register (Michalczyk & Kaczmarek 2013). The reference is: Michalczyk, Ł. & Kaczmarek, Ł. (2013) The Tardigrada Register: a comprehensive online data repository for tardigrade taxonomy. Journal of…
	9	Copyright by Łukasz Michalczyk. Enquires and suggestions: LM@tardigrada.net

## Sheet: general info
	Species		Genus species
	Population		Country.sample
	Type series		YES/NO
	Author		Name Surname
	Date		DD.MM.YYYY

## Sheet: animals
SPECIMEN	1 (HOL) 9.14.95BA.15		9.14.95BA(6)		9.14.95BA.9		9.14.95BA.13		9.29.95BA.5		9.14.95BA.24		9.14.95BA.6		9.14.95BA.7		9.14.95BA.10		9.29.95BA.25		9.14.95BA.15		9.14.95BA.6		9.8.95BA.21		9.16.95BA.61		9.16.95BA.62		9.16.95BA.65		9.16.95BA.66		9.16.95BA.68		9.16.95BA.12		9.16.95BA.13		9.16.95BA.15		9.16.95BA.15		9.16.95BA.54		9.16.95BA.53		9.16.95BA.52
CHARACTER	µm	pt	µm	pt	µm	pt	µm	pt	µm	pt	µm	pt	µm	pt	µm	pt	µm	pt	µm	pt	µm	pt	µm	pt	µm	pt	µm	pt	µm	pt	µm	pt	µm	pt	µm	pt	µm	pt	µm	pt	µm	pt	µm	pt	µm	pt	µm	pt	µm
Body length	461	968.487	479	995.842	364	786.177	451	951.477	370	1022.1	465	918.972	451	963.675	361	822.323	296	875.74	399	845.339	517	982.89	479	946.64	509	1087.61	346	891.753	474	987.5	484	1049.89	432	1038.46	300	867.052	535	1128.69	503	1045.74	500	1063.83	540	1080	276	941.98	336	872.727	488
Buccopharyngeal tube
Buccal tube length	47.6	–	48.1	–	46.3	–	47.4	–	36.2	–	50.6	–	46.8	–	43.9	–	33.8	–	47.2	–	52.6	–	50.6	–	46.8	–	38.8	–	48	–	46.1	–	41.6	–	34.6	–	47.4	–	48.1	–	47	–	50	–	29.3	–	38.5	–	48.7
Stylet support insertion point	35.7	75	35.8	74.4283	35.7	77.1058	36.9	77.8481	28	77.3481	39.6	78.2609	36.2	77.3504	34.3	78.1321	26.1	77.2189	36.9	78.178	40.7	77.3764	39.9	78.8538	36.6	78.2051	30.6	78.866	37.2	77.5	36.3	78.7419	32.8	78.8462	27.2	78.6127	37.2	78.481	37.5	77.9626	36.6	77.8723	38.8	77.6	22.7	77.4744	30.3	78.7013	38.2
Buccal tube external width	7.3	15.3361	8.7	18.0873	7.5	16.1987	8.1	17.0886	6.7	18.5083	8.5	16.7984	8.7	18.5897	6.6	15.0342	5.3	15.6805	8.9	18.8559	9.8	18.6312	8.9	17.5889	9.6	20.5128	7.5	19.3299	9.2	19.1667	9.7	21.0412	8.4	20.1923	6.4	18.4971	9.2	19.4093	9.7	20.1663	9.6	20.4255	10.4	20.8	4.6	15.6997	7	18.1818	8.8
Buccal tube internal width	5.8	12.1849	6.9	14.3451	6	12.959	6.4	13.5021	5.4	14.9171	6.8	13.4387	7.4	15.812	5.2	11.8451	4.3	12.7219	7.2	15.2542	7.8	14.8289	7.2	14.2292	7.6	16.2393	6.1	15.7216	7.1	14.7917	8	17.3536	6.2	14.9038	4.8	13.8728	7	14.7679	7.7	16.0083	7.7	16.383			3.5	11.9454	5.7	14.8052
Ventral lamina length	27.3	57.3529	29	60.2911	27.4	59.1793	27.8	58.6498	21.7	59.9448	28.2	55.7312	26.9	57.4786	25.4	57.8588	19.6	57.9882	27.9	59.1102	31.5	59.8859	29.4	58.1028	27.7	59.188	24	61.8557	28.4	59.1667	28	60.7375	25.6	61.5385	21.4	61.8497	29.8	62.8692	29	60.2911	29	61.7021	30.8	61.6			22.6	58.7013	31
Placoid lengths
Macroplacoid 1	13.6	28.5714	15	31.185	12	25.9179	13.2	27.8481	10	27.6243	14.4	28.4585	14.3	30.5556	12	27.3349	8.3	24.5562	14.6	30.9322	14.5	27.5665	15.3	30.2372	15.3	32.6923	11.5	29.6392	14.9	31.0417	15.3	33.1887	12.4	29.8077	9.7	28.0347	15.3	32.2785	15.4	32.0166	15.8	33.617	17.5	35	7.3	24.9147	9.7	25.1948	14.3
Macroplacoid 2	8.5	17.8571	9.2	19.1268	8.2	17.7106	8.4	17.7215	5.5	15.1934	8.8	17.3913	8.1	17.3077	7	15.9453	4.8	14.2012	8.6	18.2203	9.2	17.4905	9.4	18.5771	9.3	19.8718	7.3	18.8144	8.8	18.3333	10	21.692	7.9	18.9904	5	14.4509	9.9	20.8861	10.3	21.4137	9.8	20.8511	11	22	5	17.0648	7	18.1818	9.4
Microplacoid	3.8	7.98319	4.3	8.93971	3.9	8.42333	4.1	8.64979	2.7	7.45856	4.5	8.89328	3.5	7.47863	3.3	7.51708	2.5	7.39645	4.4	9.32203	4.9	9.31559	5.1	10.0791	4	8.54701	2.8	7.21649	3.6	7.5	4.3	9.32755	3.5	8.41346	2.3	6.6474	4.5	9.49367	4.6	9.56341	3.8	8.08511	4.8	9.6	2.9	9.89761	3.2	8.31169	4.7
Macroplacoid row	25	52.521	25.9	53.8462	21	45.3564	24.2	51.0549	17.5	48.3425	25.7	50.7905	26.2	55.9829	22.2	50.5695	15	44.3787	26	55.0847	26.3	50	26.6	52.5692	26.3	56.1966	21.1	54.3814	26	54.1667	27.3	59.2191	21.8	52.4038	16.5	47.6879	28	59.0717	28.2	58.6279	28	59.5745	30.9	61.8	13.5	46.0751	18.4	47.7922	25.2
Placoid row	30.2	63.4454	32.2	66.9439	26.9	58.0994	30.4	64.135	22.5	62.1547			31.6	67.5214	25.7	58.5421	18.1	53.5503	32.3	68.4322	33.4	63.4981	32.2	63.6364	32	68.3761	26	67.0103	32.5	67.7083			27.8	66.8269	20.9	60.4046	33	69.6203	34.6	71.9335	33.5	71.2766	37.8	75.6	17.2	58.7031	23.9	62.0779	31.1
Claw 1 lengths
External primary branch	11.9	25	12.1	25.1559	9.9	21.3823	11.9	25.1055	8.6	23.7569			10.8	23.0769			8.3	24.5562	12.2	25.8475	12.1	23.0038	11.9	23.5178	10.9	23.2906							10.2	24.5192	8.7	25.1445	11.6	24.4726	12.2	25.3638	11.8	25.1064	11.7	23.4	7.7	26.2799			12.4
External secondary branch	9.5	19.958			7.6	16.4147	8.5	17.9325					8	17.094					8.6	18.2203	9.4	17.8707	8.7	17.1937									7.7	18.5096	6.7	19.3642	9.1	19.1983	10.3	21.4137	9.1	19.3617	8.8	17.6	6	20.4778			9.8
Internal primary branch	11	23.1092	11	22.869	9.4	20.3024			8.1	22.3757			10.7	22.8632			7.5	22.1893	11.3	23.9407	11.3	21.4829	11.4	22.5296	10.9	23.2906			10.4	21.6667			9.8	23.5577	8.6	24.8555	11.2	23.6287	11.5	23.9085	11.2	23.8298	11.2	22.4	7.3	24.9147			10.7
Internal secondary branch	8.2	17.2269	8.2	17.0478	7.1	15.3348			6.3	17.4033			8.3	17.735			5.8	17.1598	8.3	17.5847	8.1	15.3992	8.5	16.7984					8.3	17.2917					6.4	18.4971	8.9	18.7764	9.1	18.9189	8	17.0213	8.7	17.4					8
Claw 2 lengths
External primary branch	13.2	27.7311	13.4	27.8586	10.4	22.4622	13.1	27.6371	8.8	24.3094					11.1	25.2847	8.7	25.7396	11.9	25.2119	13.1	24.9049	12.8	25.2964	12.1	25.8547	9.5	24.4845			12.3	26.6811	10.8	25.9615	8.8	25.4335	13.4	28.27	12.8	26.6112	12.8	27.234	12.9	25.8	7.9	26.9625	9.1	23.6364
External secondary branch	10.3	21.6387	8.8	18.2952	7.5	16.1987	8.9	18.7764	7.3	20.1657					8.2	18.6788	6.3	18.6391			10.2	19.3916	9.8	19.3676	8.9	19.0171	7.5	19.3299			9.3	20.1735	8.3	19.9519	6.8	19.6532	10.1	21.308	9.8	20.3742	9.1	19.3617	10.3	20.6	6.1	20.8191	7	18.1818
Internal primary branch	11.4	23.9496	12.4	25.7796	9.6	20.7343			8.2	22.6519					10.4	23.6902	7.6	22.4852	11.6	24.5763	12.4	23.5741	11.9	23.5178	11.7	25	9.3	23.9691			12.3	26.6811	9.9	23.7981	8.3	23.9884	11.8	24.8945	12.2	25.3638	11.6	24.6809	11.7	23.4	7.3	24.9147	8.1	21.039
Internal secondary branch	9.4	19.7479	8.8	18.2952	7.4	15.9827			6.7	18.5083					7.8	17.7677	5.4	15.9763	9.1	19.2797	9.7	18.4411	8.7	17.1937			7	18.0412			8.9	19.3059	8	19.2308	6.1	17.6301	8.7	18.3544	9.1	18.9189			9.5	19	6	20.4778	7.2	18.7013
Claw 3 lengths
External primary branch	13	27.3109	13.2	27.4428	10.5	22.6782	12.9	27.2152	9	24.8619			11.3	24.1453	11.1	25.2847	8.2	24.2604	12.9	27.3305	13.1	24.9049	13.1	25.8893	12.8	27.3504	10.1	26.0309			12.8	27.7657	11.4	27.4038	9	26.0116	13	27.4262	13.3	27.6507	12.6	26.8085	12.1	24.2			9.3	24.1558	12.8
External secondary branch	11.1	23.3193	8.9	18.5031	7.5	16.1987	9	18.9873	7.6	20.9945			8.3	17.735	8.8	20.0456	6.5	19.2308	10.2	21.6102	10.1	19.2015	9.5	18.7747	9.4	20.0855	7.1	18.299			10	21.692	8.4	20.1923	6.9	19.9422	10	21.097	9.4	19.5426	9.6	20.4255	9.3	18.6			7.4	19.2208	9.4
Internal primary branch	12.5	26.2605	12.2	25.3638					8.5	23.4807			11.3	24.1453	10	22.779	8.2	24.2604	11.1	23.5169	12.6	23.9544	11.7	23.1225	11.4	24.359	9.4	24.2268	12.1	25.2083	12.3	26.6811	10.1	24.2788	8.8	25.4335	12	25.3165	12.4	25.7796	12	25.5319	11.7	23.4			8.9	23.1169	11.6
Internal secondary branch	9.8	20.5882	9	18.711					6.3	17.4033			7.9	16.8803	7.5	17.0843	5.5	16.2722	9	19.0678	9.7	18.4411	9	17.7866			8	20.6186	9.4	19.5833			8	19.2308	6.8	19.6532	9.2	19.4093	9.4	19.5426	9.4	20	8.6	17.2					9.1
Claw 4 lengths
Anterior primary branch	12	25.2101	14.9	30.9771	10.1	21.8143			9.7	26.7956			13.8	29.4872	11.4	25.9681	9	26.6272	12.7	26.9068	14.9	28.327	13.1	25.8893					12.6	26.25	13	28.1996	12.2	29.3269	9.5	27.4566	13.1	27.6371			12.8	27.234	13.3	26.6			10.4	27.013	12.8
Anterior secondary branch	8.8	18.4874	10.5	21.8295					7.3	20.1657			8.9	19.0171	8.2	18.6788	6.5	19.2308	9.5	20.1271	10.5	19.962	9.7	19.17					9.2	19.1667					7.2	20.8092	9.4	19.8312			8.4	17.8723	10.1	20.2			7.6	19.7403	9.2
Posterior primary branch	13.5	28.3613			11.5	24.838			10.2	28.1768			14.8	31.6239	12.5	28.4738	9.1	26.9231	13.8	29.2373	14.3	27.1863	14.4	28.4585					13.3	27.7083	13	28.1996	12.5	30.0481	10.1	29.1908	14	29.5359			14.1	30	13.9	27.8			10.6	27.5325	14.3
Posterior secondary branch	10.4	21.8487			8.3	17.9266			7.2	19.8895			9.6	20.5128	9	20.5011	6.4	18.9349	10.1	21.3983	10.5	19.962	10.1	19.9605					9.7	20.2083			9.7	23.3173	7.9	22.8324	10.4	21.9409			10.2	21.7021	10.2	20.4			7.5	19.4805	11.1
Eyes (0 = absent; 1 = present)	1		1		1		1		1		1		1		1		1		1		1		1		1		1		1		1		1		1		1		1		1		1		0		1		1
Cuticular pores (0/1)	1		1		1		1		1		1		1		1		1		1		1		1		1		1		1		1		1		1		1		1		1		1		1		1		1
Lunules I with teeth (0/1)	0		0		0		0		0		0		0		0		0		0		0		0		0		0		0		0		0		0		0		0		0		0		0		0		0
Lunules II with teeth (0/1)	0		0		0		0		0		0		0		0		0		0		0		0		0		0		0		0		0		0		0		0		0		0		0		0		0
Lunules III with teeth (0/1)	0		0		0		0		0		0		0		0		0		0		0		0		0		0		0		0		0		0		0		0		0		0		0		0		0
Lunules IV with teeth (0/1)	0		0		0		0		0		0		0		0		0		0		0		0		0		0		0		0		0		0		0		0		0		0		0		0		0
Granulation on legs I (0/1)	0		0		0		0		0		0		0		0		0		0		0		0		0		0		0		0		0		0		0		0		0		0		0		0		0
Granulation on legs II (0/1)	0		0		0		0		0		0		0		0		0		0		0		0		0		0		0		0		0		0		0		0		0		0		0		0		0
Granulation on legs III (0/1)	0		0		0		0		0		0		0		0		0		0		0		0		0		0		0		0		0		0		0		0		0		0		0		0		0
Granulation on legs IV (0/1)	1		1		1		1		1		1		1		1		1		1		1		1		1		1		1		1		1		1		1		1		1		1		1		1		1
[truncated: 25 more columns]

## Sheet: eggs
CHARACTER	8.7.95.BA4	9.16.95.BA15	9.14.95.BA36	9.14.95.BA77	9.14.95.BA75	9.16.95.BA18	9.16.95.BA72	9.14.95.BA28	9.16.95.BA12	10	11	12	13	14	15	16	17	18	19	20	21	22	23	24	25	26	27	28	29	30		CHARACTER	N	RANGE			MEAN	SD
Diameter of egg without processes		86.6	85.6	72.8	80.3	88.4	82.8	72.3	88.9																							Diameter of egg without processes	8	72.3	–	88.9	82.2125	6.59641
Diameter of egg with processes		107.4	113.3	98.4	101.4	107.3	109.9	96	103																							Diameter of egg with processes	8	96	–	113.3	104.587	5.90531
Process height	17	14.2	14.2	14.2	12.9	14.6	12.4	11.7	15.7																							Process height	25	10.9	–	17	13.756	1.47566
	16	14	12.6	12.8	12.5	14	10.9	12.7	15.5																							Process base width	25	14.2	–	19	16.404	1.21191
		13.3	14.6	12.9	12.7	13.6	12.9	16																								Process base/height ratio	25	1.01429	–	1.42202	1.20085	0.117554
Process base width	19	17.2	17.2	14.6	15.7	15.9	15.8	15.9	17.1																							Terminal disc width	0		?		?	?
	17.2	14.2	16.4	14.4	17.4	17.1	15.5	16.4	17.1																							Distance between processes	23	3.9	–	7.5	5.25217	0.925826
		15.8	17.1	14.9	17.2	17.6	15.2	18.2																								Number of processes on the egg circumference	8	14	–	14	14	0
Process base/height ratio	1.11765	1.21127	1.21127	1.02817	1.21705	1.08904	1.27419	1.35897	1.08917
	1.075	1.01429	1.30159	1.125	1.392	1.22143	1.42202	1.29134	1.10323
		1.18797	1.17123	1.15504	1.35433	1.29412	1.17829	1.1375
Terminal disc width
Distance between processes	6.2	5.8	4.3	6.2	4.9	5	5.3	4.1	4.6
		4.8	6.1	5.5		7.5	4.8	5.7	6.9
		5.1	5.5	3.9		5.5	4.1	4.9	4.1
Number of processes on the egg circumference		14	14	14	14	14	14	14	14

## Sheet: animals_stats (μm)
Species	Population	Individual	Body length	Buccal tube length	Pharyngeal tube length	Buccopharyngeal tube length	Buccal/pharyngeal tube length ratio	Stylet support insertion point	Buccal tube external width	Buccal tube internal width	Ventral lamina length	Macroplacoid 1	Macroplacoid 2	Macroplacoid 3	Microplacoid	Septulum	Macroplacoid row	Placoid row	Claw 1 external base	Claw 1 external primary branch	Claw 1 external secondary branch	Claw 1 internal base	Claw 1 internal primary branch	Claw 1 internal secondary branch	Claw 2 external base	Claw 2 external primary branch	Claw 2 external secondary branch	Claw 2 internal base	Claw 2 internal primary branch	Claw 2 internal secondary branch	Claw 3 external base	Claw 3 external primary branch	Claw 3 external secondary branch	Claw 3 internal base	Claw 3 internal primary branch	Claw 3 internal secondary branch	Claw 4 anterior base	Claw 4 anterior primary branch	Claw 4 anterior secondary branch	Claw 4 posterior base	Claw 4 posterior primary branch	Claw 4 posterior secondary branch
Genus species	Country.sample	1 (HOL) 9.14.95BA.15	461	47.6	#REF!	#REF!	#REF!	35.7	7.3	5.8	27.3	13.6	8.5	#REF!	3.8	#REF!	25	30.2	#REF!	11.9	9.5	#REF!	11	8.2	#REF!	13.2	10.3	#REF!	11.4	9.4	#REF!	13	11.1	#REF!	12.5	9.8	#REF!	12	8.8	#REF!	13.5	10.4
Genus species	Country.sample	9.14.95BA(6)	479	48.1	#REF!	#REF!	#REF!	35.8	8.7	6.9	29	15	9.2	#REF!	4.3	#REF!	25.9	32.2	#REF!	12.1		#REF!	11	8.2	#REF!	13.4	8.8	#REF!	12.4	8.8	#REF!	13.2	8.9	#REF!	12.2	9	#REF!	14.9	10.5	#REF!
Genus species	Country.sample	9.14.95BA.9	364	46.3	#REF!	#REF!	#REF!	35.7	7.5	6	27.4	12	8.2	#REF!	3.9	#REF!	21	26.9	#REF!	9.9	7.6	#REF!	9.4	7.1	#REF!	10.4	7.5	#REF!	9.6	7.4	#REF!	10.5	7.5	#REF!			#REF!	10.1		#REF!	11.5	8.3
Genus species	Country.sample	9.14.95BA.13	451	47.4	#REF!	#REF!	#REF!	36.9	8.1	6.4	27.8	13.2	8.4	#REF!	4.1	#REF!	24.2	30.4	#REF!	11.9	8.5	#REF!			#REF!	13.1	8.9	#REF!			#REF!	12.9	9	#REF!			#REF!			#REF!
Genus species	Country.sample	9.29.95BA.5	370	36.2	#REF!	#REF!	#REF!	28	6.7	5.4	21.7	10	5.5	#REF!	2.7	#REF!	17.5	22.5	#REF!	8.6		#REF!	8.1	6.3	#REF!	8.8	7.3	#REF!	8.2	6.7	#REF!	9	7.6	#REF!	8.5	6.3	#REF!	9.7	7.3	#REF!	10.2	7.2
Genus species	Country.sample	9.14.95BA.24	465	50.6	#REF!	#REF!	#REF!	39.6	8.5	6.8	28.2	14.4	8.8	#REF!	4.5	#REF!	25.7		#REF!			#REF!			#REF!			#REF!			#REF!			#REF!			#REF!			#REF!
Genus species	Country.sample	9.14.95BA.6	451	46.8	#REF!	#REF!	#REF!	36.2	8.7	7.4	26.9	14.3	8.1	#REF!	3.5	#REF!	26.2	31.6	#REF!	10.8	8	#REF!	10.7	8.3	#REF!			#REF!			#REF!	11.3	8.3	#REF!	11.3	7.9	#REF!	13.8	8.9	#REF!	14.8	9.6
Genus species	Country.sample	9.14.95BA.7	361	43.9	#REF!	#REF!	#REF!	34.3	6.6	5.2	25.4	12	7	#REF!	3.3	#REF!	22.2	25.7	#REF!			#REF!			#REF!	11.1	8.2	#REF!	10.4	7.8	#REF!	11.1	8.8	#REF!	10	7.5	#REF!	11.4	8.2	#REF!	12.5	9
Genus species	Country.sample	9.14.95BA.10	296	33.8	#REF!	#REF!	#REF!	26.1	5.3	4.3	19.6	8.3	4.8	#REF!	2.5	#REF!	15	18.1	#REF!	8.3		#REF!	7.5	5.8	#REF!	8.7	6.3	#REF!	7.6	5.4	#REF!	8.2	6.5	#REF!	8.2	5.5	#REF!	9	6.5	#REF!	9.1	6.4
Genus species	Country.sample	9.29.95BA.25	399	47.2	#REF!	#REF!	#REF!	36.9	8.9	7.2	27.9	14.6	8.6	#REF!	4.4	#REF!	26	32.3	#REF!	12.2	8.6	#REF!	11.3	8.3	#REF!	11.9		#REF!	11.6	9.1	#REF!	12.9	10.2	#REF!	11.1	9	#REF!	12.7	9.5	#REF!	13.8	10.1
Genus species	Country.sample	9.14.95BA.15	517	52.6	#REF!	#REF!	#REF!	40.7	9.8	7.8	31.5	14.5	9.2	#REF!	4.9	#REF!	26.3	33.4	#REF!	12.1	9.4	#REF!	11.3	8.1	#REF!	13.1	10.2	#REF!	12.4	9.7	#REF!	13.1	10.1	#REF!	12.6	9.7	#REF!	14.9	10.5	#REF!	14.3	10.5
Genus species	Country.sample	9.14.95BA.6	479	50.6	#REF!	#REF!	#REF!	39.9	8.9	7.2	29.4	15.3	9.4	#REF!	5.1	#REF!	26.6	32.2	#REF!	11.9	8.7	#REF!	11.4	8.5	#REF!	12.8	9.8	#REF!	11.9	8.7	#REF!	13.1	9.5	#REF!	11.7	9	#REF!	13.1	9.7	#REF!	14.4	10.1
Genus species	Country.sample	9.8.95BA.21	509	46.8	#REF!	#REF!	#REF!	36.6	9.6	7.6	27.7	15.3	9.3	#REF!	4	#REF!	26.3	32	#REF!	10.9		#REF!	10.9		#REF!	12.1	8.9	#REF!	11.7		#REF!	12.8	9.4	#REF!	11.4		#REF!			#REF!
Genus species	Country.sample	9.16.95BA.61	346	38.8	#REF!	#REF!	#REF!	30.6	7.5	6.1	24	11.5	7.3	#REF!	2.8	#REF!	21.1	26	#REF!			#REF!			#REF!	9.5	7.5	#REF!	9.3	7	#REF!	10.1	7.1	#REF!	9.4	8	#REF!			#REF!
Genus species	Country.sample	9.16.95BA.62	474	48	#REF!	#REF!	#REF!	37.2	9.2	7.1	28.4	14.9	8.8	#REF!	3.6	#REF!	26	32.5	#REF!			#REF!	10.4	8.3	#REF!			#REF!			#REF!			#REF!	12.1	9.4	#REF!	12.6	9.2	#REF!	13.3	9.7
Genus species	Country.sample	9.16.95BA.65	484	46.1	#REF!	#REF!	#REF!	36.3	9.7	8	28	15.3	10	#REF!	4.3	#REF!	27.3		#REF!			#REF!			#REF!	12.3	9.3	#REF!	12.3	8.9	#REF!	12.8	10	#REF!	12.3		#REF!	13		#REF!	13
Genus species	Country.sample	9.16.95BA.66	432	41.6	#REF!	#REF!	#REF!	32.8	8.4	6.2	25.6	12.4	7.9	#REF!	3.5	#REF!	21.8	27.8	#REF!	10.2	7.7	#REF!	9.8		#REF!	10.8	8.3	#REF!	9.9	8	#REF!	11.4	8.4	#REF!	10.1	8	#REF!	12.2		#REF!	12.5	9.7
Genus species	Country.sample	9.16.95BA.68	300	34.6	#REF!	#REF!	#REF!	27.2	6.4	4.8	21.4	9.7	5	#REF!	2.3	#REF!	16.5	20.9	#REF!	8.7	6.7	#REF!	8.6	6.4	#REF!	8.8	6.8	#REF!	8.3	6.1	#REF!	9	6.9	#REF!	8.8	6.8	#REF!	9.5	7.2	#REF!	10.1	7.9
Genus species	Country.sample	9.16.95BA.12	535	47.4	#REF!	#REF!	#REF!	37.2	9.2	7	29.8	15.3	9.9	#REF!	4.5	#REF!	28	33	#REF!	11.6	9.1	#REF!	11.2	8.9	#REF!	13.4	10.1	#REF!	11.8	8.7	#REF!	13	10	#REF!	12	9.2	#REF!	13.1	9.4	#REF!	14	10.4
Genus species	Country.sample	9.16.95BA.13	503	48.1	#REF!	#REF!	#REF!	37.5	9.7	7.7	29	15.4	10.3	#REF!	4.6	#REF!	28.2	34.6	#REF!	12.2	10.3	#REF!	11.5	9.1	#REF!	12.8	9.8	#REF!	12.2	9.1	#REF!	13.3	9.4	#REF!	12.4	9.4	#REF!			#REF!
Genus species	Country.sample	9.16.95BA.15	500	47	#REF!	#REF!	#REF!	36.6	9.6	7.7	29	15.8	9.8	#REF!	3.8	#REF!	28	33.5	#REF!	11.8	9.1	#REF!	11.2	8	#REF!	12.8	9.1	#REF!	11.6		#REF!	12.6	9.6	#REF!	12	9.4	#REF!	12.8	8.4	#REF!	14.1	10.2
Genus species	Country.sample	9.16.95BA.15	540	50	#REF!	#REF!	#REF!	38.8	10.4		30.8	17.5	11	#REF!	4.8	#REF!	30.9	37.8	#REF!	11.7	8.8	#REF!	11.2	8.7	#REF!	12.9	10.3	#REF!	11.7	9.5	#REF!	12.1	9.3	#REF!	11.7	8.6	#REF!	13.3	10.1	#REF!	13.9	10.2
Genus species	Country.sample	9.16.95BA.54	276	29.3	#REF!	#REF!	#REF!	22.7	4.6	3.5		7.3	5	#REF!	2.9	#REF!	13.5	17.2	#REF!	7.7	6	#REF!	7.3		#REF!	7.9	6.1	#REF!	7.3	6	#REF!			#REF!			#REF!			#REF!
Genus species	Country.sample	9.16.95BA.53	336	38.5	#REF!	#REF!	#REF!	30.3	7	5.7	22.6	9.7	7	#REF!	3.2	#REF!	18.4	23.9	#REF!			#REF!			#REF!	9.1	7	#REF!	8.1	7.2	#REF!	9.3	7.4	#REF!	8.9		#REF!	10.4	7.6	#REF!	10.6	7.5
Genus species	Country.sample	9.16.95BA.52	488	48.7	#REF!	#REF!	#REF!	38.2	8.8		31	14.3	9.4	#REF!	4.7	#REF!	25.2	31.1	#REF!	12.4	9.8	#REF!	10.7	8	#REF!			#REF!			#REF!	12.8	9.4	#REF!	11.6	9.1	#REF!	12.8	9.2	#REF!	14.3	11.1
Genus species	Country.sample	9.16.95BA.51	496	47.6	#REF!	#REF!	#REF!	36.5	9.7	7.9	27.9	16.1	10.8	#REF!	4.7	#REF!	28.8	35.8	#REF!			#REF!			#REF!	12.9	10.1	#REF!	12.5	9.4	#REF!	12.9	10.5	#REF!			#REF!			#REF!
Genus species	Country.sample	9.30.95BA.7	383	42.9	#REF!	#REF!	#REF!	33.7	7	5.2	25.5	12.9	7.4	#REF!	3.8	#REF!	22	27	#REF!	10.7	7.9	#REF!	10	8	#REF!	11.8	8.4	#REF!	10.9	8.4	#REF!	11.7	9	#REF!	10.4	8.7	#REF!	11.7	8.6	#REF!	12.6	9.4
Genus species	Country.sample	9.30.95BA.7	530	47.5	#REF!	#REF!	#REF!	37.5	8.6	6.5	29	15.2	9.7	#REF!	4.9	#REF!	26.1	33.8	#REF!			#REF!			#REF!	13.1		#REF!	12.2	8.9	#REF!	13.8	10	#REF!	13	10.1	#REF!	14.1	11.1	#REF!	14.4	11.2
Genus species	Country.sample	9.30.95BA.7	395	41.6	#REF!	#REF!	#REF!	32	6.5	4.7	26.3	10.9	7.4	#REF!	3.3	#REF!	20.4	25.4	#REF!	10.7	7.8	#REF!	10.3		#REF!	11.5	8.6	#REF!	10.3		#REF!	11.5	8.6	#REF!	10.4		#REF!	11.3	8.6	#REF!	12.8	9.8
Genus species	Country.sample	9.30.95BA.5	294	35.1	#REF!	#REF!	#REF!	27.4	5.9	4.5	22.3	10.1	5.6	#REF!	2.4	#REF!	17.9	22.4	#REF!	8.5	6.4	#REF!	7.9	5.8	#REF!	8.7	6.5	#REF!	8.5	6.7	#REF!	8.6	6.5	#REF!	8	6	#REF!	9.3	7	#REF!	10	7.5

## Sheet: animals_stats (pt)
Species	Population	Individual	Body length	Pharyngeal tube length	Buccopharyngeal tube length	Stylet support insertion point	Buccal tube external width	Buccal tube internal width	Ventral lamina length	Macroplacoid 1	Macroplacoid 2	Macroplacoid 3	Microplacoid	Septulum	Macroplacoid row	Placoid row	Claw 1 external base	Claw 1 external primary branch	Claw 1 external secondary branch	Claw 1 internal base	Claw 1 internal primary branch	Claw 1 internal secondary branch	Claw 2 external base	Claw 2 external primary branch	Claw 2 external secondary branch	Claw 2 internal base	Claw 2 internal primary branch	Claw 2 internal secondary branch	Claw 3 external base	Claw 3 external primary branch	Claw 3 external secondary branch	Claw 3 internal base	Claw 3 internal primary branch	Claw 3 internal secondary branch	Claw 4 anterior base	Claw 4 anterior primary branch	Claw 4 anterior secondary branch	Claw 4 posterior base	Claw 4 posterior primary branch	Claw 4 posterior secondary branch
Genus species	Country.sample	1 (HOL) 9.14.95BA.15	968.487	#REF!	#REF!	75	15.3361	12.1849	57.3529	28.5714	17.8571	#REF!	7.98319	#REF!	52.521	63.4454	#REF!	25	19.958	#REF!	23.1092	17.2269	#REF!	27.7311	21.6387	#REF!	23.9496	19.7479	#REF!	27.3109	23.3193	#REF!	26.2605	20.5882	#REF!	25.2101	18.4874	#REF!	28.3613	21.8487
Genus species	Country.sample	9.14.95BA(6)	995.842	#REF!	#REF!	74.4283	18.0873	14.3451	60.2911	31.185	19.1268	#REF!	8.93971	#REF!	53.8462	66.9439	#REF!	25.1559		#REF!	22.869	17.0478	#REF!	27.8586	18.2952	#REF!	25.7796	18.2952	#REF!	27.4428	18.5031	#REF!	25.3638	18.711	#REF!	30.9771	21.8295	#REF!
Genus species	Country.sample	9.14.95BA.9	786.177	#REF!	#REF!	77.1058	16.1987	12.959	59.1793	25.9179	17.7106	#REF!	8.42333	#REF!	45.3564	58.0994	#REF!	21.3823	16.4147	#REF!	20.3024	15.3348	#REF!	22.4622	16.1987	#REF!	20.7343	15.9827	#REF!	22.6782	16.1987	#REF!			#REF!	21.8143		#REF!	24.838	17.9266
Genus species	Country.sample	9.14.95BA.13	951.477	#REF!	#REF!	77.8481	17.0886	13.5021	58.6498	27.8481	17.7215	#REF!	8.64979	#REF!	51.0549	64.135	#REF!	25.1055	17.9325	#REF!			#REF!	27.6371	18.7764	#REF!			#REF!	27.2152	18.9873	#REF!			#REF!			#REF!
Genus species	Country.sample	9.29.95BA.5	1022.1	#REF!	#REF!	77.3481	18.5083	14.9171	59.9448	27.6243	15.1934	#REF!	7.45856	#REF!	48.3425	62.1547	#REF!	23.7569		#REF!	22.3757	17.4033	#REF!	24.3094	20.1657	#REF!	22.6519	18.5083	#REF!	24.8619	20.9945	#REF!	23.4807	17.4033	#REF!	26.7956	20.1657	#REF!	28.1768	19.8895
Genus species	Country.sample	9.14.95BA.24	918.972	#REF!	#REF!	78.2609	16.7984	13.4387	55.7312	28.4585	17.3913	#REF!	8.89328	#REF!	50.7905		#REF!			#REF!			#REF!			#REF!			#REF!			#REF!			#REF!			#REF!
Genus species	Country.sample	9.14.95BA.6	963.675	#REF!	#REF!	77.3504	18.5897	15.812	57.4786	30.5556	17.3077	#REF!	7.47863	#REF!	55.9829	67.5214	#REF!	23.0769	17.094	#REF!	22.8632	17.735	#REF!			#REF!			#REF!	24.1453	17.735	#REF!	24.1453	16.8803	#REF!	29.4872	19.0171	#REF!	31.6239	20.5128
Genus species	Country.sample	9.14.95BA.7	822.323	#REF!	#REF!	78.1321	15.0342	11.8451	57.8588	27.3349	15.9453	#REF!	7.51708	#REF!	50.5695	58.5421	#REF!			#REF!			#REF!	25.2847	18.6788	#REF!	23.6902	17.7677	#REF!	25.2847	20.0456	#REF!	22.779	17.0843	#REF!	25.9681	18.6788	#REF!	28.4738	20.5011
Genus species	Country.sample	9.14.95BA.10	875.74	#REF!	#REF!	77.2189	15.6805	12.7219	57.9882	24.5562	14.2012	#REF!	7.39645	#REF!	44.3787	53.5503	#REF!	24.5562		#REF!	22.1893	17.1598	#REF!	25.7396	18.6391	#REF!	22.4852	15.9763	#REF!	24.2604	19.2308	#REF!	24.2604	16.2722	#REF!	26.6272	19.2308	#REF!	26.9231	18.9349
Genus species	Country.sample	9.29.95BA.25	845.339	#REF!	#REF!	78.178	18.8559	15.2542	59.1102	30.9322	18.2203	#REF!	9.32203	#REF!	55.0847	68.4322	#REF!	25.8475	18.2203	#REF!	23.9407	17.5847	#REF!	25.2119		#REF!	24.5763	19.2797	#REF!	27.3305	21.6102	#REF!	23.5169	19.0678	#REF!	26.9068	20.1271	#REF!	29.2373	21.3983
Genus species	Country.sample	9.14.95BA.15	982.89	#REF!	#REF!	77.3764	18.6312	14.8289	59.8859	27.5665	17.4905	#REF!	9.31559	#REF!	50	63.4981	#REF!	23.0038	17.8707	#REF!	21.4829	15.3992	#REF!	24.9049	19.3916	#REF!	23.5741	18.4411	#REF!	24.9049	19.2015	#REF!	23.9544	18.4411	#REF!	28.327	19.962	#REF!	27.1863	19.962
Genus species	Country.sample	9.14.95BA.6	946.64	#REF!	#REF!	78.8538	17.5889	14.2292	58.1028	30.2372	18.5771	#REF!	10.0791	#REF!	52.5692	63.6364	#REF!	23.5178	17.1937	#REF!	22.5296	16.7984	#REF!	25.2964	19.3676	#REF!	23.5178	17.1937	#REF!	25.8893	18.7747	#REF!	23.1225	17.7866	#REF!	25.8893	19.17	#REF!	28.4585	19.9605
Genus species	Country.sample	9.8.95BA.21	1087.61	#REF!	#REF!	78.2051	20.5128	16.2393	59.188	32.6923	19.8718	#REF!	8.54701	#REF!	56.1966	68.3761	#REF!	23.2906		#REF!	23.2906		#REF!	25.8547	19.0171	#REF!	25		#REF!	27.3504	20.0855	#REF!	24.359		#REF!			#REF!
Genus species	Country.sample	9.16.95BA.61	891.753	#REF!	#REF!	78.866	19.3299	15.7216	61.8557	29.6392	18.8144	#REF!	7.21649	#REF!	54.3814	67.0103	#REF!			#REF!			#REF!	24.4845	19.3299	#REF!	23.9691	18.0412	#REF!	26.0309	18.299	#REF!	24.2268	20.6186	#REF!			#REF!
Genus species	Country.sample	9.16.95BA.62	987.5	#REF!	#REF!	77.5	19.1667	14.7917	59.1667	31.0417	18.3333	#REF!	7.5	#REF!	54.1667	67.7083	#REF!			#REF!	21.6667	17.2917	#REF!			#REF!			#REF!			#REF!	25.2083	19.5833	#REF!	26.25	19.1667	#REF!	27.7083	20.2083
Genus species	Country.sample	9.16.95BA.65	1049.89	#REF!	#REF!	78.7419	21.0412	17.3536	60.7375	33.1887	21.692	#REF!	9.32755	#REF!	59.2191		#REF!			#REF!			#REF!	26.6811	20.1735	#REF!	26.6811	19.3059	#REF!	27.7657	21.692	#REF!	26.6811		#REF!	28.1996		#REF!	28.1996
Genus species	Country.sample	9.16.95BA.66	1038.46	#REF!	#REF!	78.8462	20.1923	14.9038	61.5385	29.8077	18.9904	#REF!	8.41346	#REF!	52.4038	66.8269	#REF!	24.5192	18.5096	#REF!	23.5577		#REF!	25.9615	19.9519	#REF!	23.7981	19.2308	#REF!	27.4038	20.1923	#REF!	24.2788	19.2308	#REF!	29.3269		#REF!	30.0481	23.3173
Genus species	Country.sample	9.16.95BA.68	867.052	#REF!	#REF!	78.6127	18.4971	13.8728	61.8497	28.0347	14.4509	#REF!	6.6474	#REF!	47.6879	60.4046	#REF!	25.1445	19.3642	#REF!	24.8555	18.4971	#REF!	25.4335	19.6532	#REF!	23.9884	17.6301	#REF!	26.0116	19.9422	#REF!	25.4335	19.6532	#REF!	27.4566	20.8092	#REF!	29.1908	22.8324
Genus species	Country.sample	9.16.95BA.12	1128.69	#REF!	#REF!	78.481	19.4093	14.7679	62.8692	32.2785	20.8861	#REF!	9.49367	#REF!	59.0717	69.6203	#REF!	24.4726	19.1983	#REF!	23.6287	18.7764	#REF!	28.27	21.308	#REF!	24.8945	18.3544	#REF!	27.4262	21.097	#REF!	25.3165	19.4093	#REF!	27.6371	19.8312	#REF!	29.5359	21.9409
Genus species	Country.sample	9.16.95BA.13	1045.74	#REF!	#REF!	77.9626	20.1663	16.0083	60.2911	32.0166	21.4137	#REF!	9.56341	#REF!	58.6279	71.9335	#REF!	25.3638	21.4137	#REF!	23.9085	18.9189	#REF!	26.6112	20.3742	#REF!	25.3638	18.9189	#REF!	27.6507	19.5426	#REF!	25.7796	19.5426	#REF!			#REF!
Genus species	Country.sample	9.16.95BA.15	1063.83	#REF!	#REF!	77.8723	20.4255	16.383	61.7021	33.617	20.8511	#REF!	8.08511	#REF!	59.5745	71.2766	#REF!	25.1064	19.3617	#REF!	23.8298	17.0213	#REF!	27.234	19.3617	#REF!	24.6809		#REF!	26.8085	20.4255	#REF!	25.5319	20	#REF!	27.234	17.8723	#REF!	30	21.7021
Genus species	Country.sample	9.16.95BA.15	1080	#REF!	#REF!	77.6	20.8		61.6	35	22	#REF!	9.6	#REF!	61.8	75.6	#REF!	23.4	17.6	#REF!	22.4	17.4	#REF!	25.8	20.6	#REF!	23.4	19	#REF!	24.2	18.6	#REF!	23.4	17.2	#REF!	26.6	20.2	#REF!	27.8	20.4
Genus species	Country.sample	9.16.95BA.54	941.98	#REF!	#REF!	77.4744	15.6997	11.9454		24.9147	17.0648	#REF!	9.89761	#REF!	46.0751	58.7031	#REF!	26.2799	20.4778	#REF!	24.9147		#REF!	26.9625	20.8191	#REF!	24.9147	20.4778	#REF!			#REF!			#REF!			#REF!
Genus species	Country.sample	9.16.95BA.53	872.727	#REF!	#REF!	78.7013	18.1818	14.8052	58.7013	25.1948	18.1818	#REF!	8.31169	#REF!	47.7922	62.0779	#REF!			#REF!			#REF!	23.6364	18.1818	#REF!	21.039	18.7013	#REF!	24.1558	19.2208	#REF!	23.1169		#REF!	27.013	19.7403	#REF!	27.5325	19.4805
Genus species	Country.sample	9.16.95BA.52	1002.05	#REF!	#REF!	78.4394	18.0698		63.655	29.3634	19.3018	#REF!	9.65092	#REF!	51.7454	63.8604	#REF!	25.462	20.1232	#REF!	21.9713	16.4271	#REF!			#REF!			#REF!	26.2834	19.3018	#REF!	23.8193	18.6858	#REF!	26.2834	18.8912	#REF!	29.3634	22.7926
Genus species	Country.sample	9.16.95BA.51	1042.02	#REF!	#REF!	76.6807	20.3782	16.5966	58.6134	33.8235	22.6891	#REF!	9.87395	#REF!	60.5042	75.2101	#REF!			#REF!			#REF!	27.1008	21.2185	#REF!	26.2605	19.7479	#REF!	27.1008	22.0588	#REF!			#REF!			#REF!
Genus species	Country.sample	9.30.95BA.7	892.774	#REF!	#REF!	78.5548	16.317	12.1212	59.4406	30.0699	17.2494	#REF!	8.85781	#REF!	51.2821	62.9371	#REF!	24.9417	18.4149	#REF!	23.31	18.648	#REF!	27.5058	19.5804	#REF!	25.4079	19.5804	#REF!	27.2727	20.979	#REF!	24.2424	20.2797	#REF!	27.2727	20.0466	#REF!	29.3706	21.9114
Genus species	Country.sample	9.30.95BA.7	1115.79	#REF!	#REF!	78.9474	18.1053	13.6842	61.0526	32	20.4211	#REF!	10.3158	#REF!	54.9474	71.1579	#REF!			#REF!			#REF!	27.5789		#REF!	25.6842	18.7368	#REF!	29.0526	21.0526	#REF!	27.3684	21.2632	#REF!	29.6842	23.3684	#REF!	30.3158	23.5789
Genus species	Country.sample	9.30.95BA.7	949.519	#REF!	#REF!	76.9231	15.625	11.2981	63.2212	26.2019	17.7885	#REF!	7.93269	#REF!	49.0385	61.0577	#REF!	25.7212	18.75	#REF!	24.7596		#REF!	27.6442	20.6731	#REF!	24.7596		#REF!	27.6442	20.6731	#REF!	25		#REF!	27.1635	20.6731	#REF!	30.7692	23.5577
Genus species	Country.sample	9.30.95BA.5	837.607	#REF!	#REF!	78.0627	16.8091	12.8205	63.5328	28.7749	15.9544	#REF!	6.83761	#REF!	50.9972	63.8177	#REF!	24.2165	18.2336	#REF!	22.5071	16.5242	#REF!	24.7863	18.5185	#REF!	24.2165	19.0883	#REF!	24.5014	18.5185	#REF!	22.792	17.094	#REF!	26.4957	19.943	#REF!	28.49	21.3675

## Sheet: eggs_stats (μm)
Species	Population	egg	Diameter of egg without processes	Diameter of egg with processes	Process height	Process base width	Process base/height ratio	Terminal disc width	Distance between processes	Number of processes on the egg circumference
Genus species	Country.sample	8.7.95.BA4			16.5	18.1	1.09632		6.2
Genus species	Country.sample	9.16.95.BA15	86.6	107.4	13.8333	15.7333	1.13784		5.23333	14
Genus species	Country.sample	9.14.95.BA36	85.6	113.3	13.8	16.9	1.22803		5.3	14
Genus species	Country.sample	9.14.95.BA77	72.8	98.4	13.3	14.6333	1.10274		5.2	14
Genus species	Country.sample	9.14.95.BA75	80.3	101.4	12.7	16.7667	1.32113		4.9	14
Genus species	Country.sample	9.16.95.BA18	88.4	107.3	14.0667	16.8667	1.20153		6	14
Genus species	Country.sample	9.16.95.BA72	82.8	109.9	12.0667	15.5	1.2915		4.73333	14
Genus species	Country.sample	9.14.95.BA28	72.3	96	13.4667	16.8333	1.2626		4.9	14
Genus species	Country.sample	9.16.95.BA12	88.9	103	15.6	17.1	1.0962		5.2	14
Genus species	Country.sample	10
Genus species	Country.sample	11
Genus species	Country.sample	12
Genus species	Country.sample	13
Genus species	Country.sample	14
Genus species	Country.sample	15
Genus species	Country.sample	16
Genus species	Country.sample	17
Genus species	Country.sample	18
Genus species	Country.sample	19
Genus species	Country.sample	20
Genus species	Country.sample	21
Genus species	Country.sample	22
Genus species	Country.sample	23
Genus species	Country.sample	24
Genus species	Country.sample	25
Genus species	Country.sample	26
Genus species	Country.sample	27
Genus species	Country.sample	28
Genus species	Country.sample	29
Genus species	Country.sample	30
